# Supplementary material for: The palladium(ii) complex of N,N-diethyl-1-ferrocenyl-3-thiabutanamine: synthesis, solution and solid state structure and catalytic activity in Suzuki–Miyaura reaction
Source: Royal Society of Chemistry journal article supplement (doi:10.1039/c4ra08140d), 2014-01-01
Supplement: c4ra08140d1.pdf [file c4ra08140d1.pdf]

## The palladium(II) complex of *N,N*-diethyl-1-ferrocenyl-3-thiabutanamine: synthesis, solution and solid state structure and catalytic activity in Suzuki-Miyaura reaction

Ivan Damljanović,<sup>a</sup> Dragana Stevanović,<sup>a</sup> Anka Pejović,<sup>a</sup> Danijela Ilić,<sup>b</sup> Marija Živković,<sup>a</sup> Jovana Jovanović,<sup>a</sup> Mirjana Vukićević,<sup>c</sup> Goran A. Bogdanović,<sup>d</sup> Niko S. Radulović\*<sup>e</sup> and Rastko D. Vukićević\*<sup>a</sup>

<sup>a</sup>*Department of Chemistry, Faculty of Science, University of Kragujevac, R. Domanovića 12, 34000 Kragujevac, Serbia.*

<sup>b</sup>*Faculty of Technical Sciences Kosovska Mitrovica, University of Priština, Kneza Miloša 7, 38220 Kosovska Mitrovica, Serbia.*

<sup>c</sup>*Department of Pharmacy, Faculty of Medical Sciences, University of Kragujevac, S. Markovića 69, 34000 Kragujevac, Serbia.*

<sup>d</sup>*Vinča Institute of Nuclear Sciences, University of Belgrade, PO Box 522, 11001 Belgrade, Serbia.*

<sup>e</sup>*Department of Chemistry, Faculty of Science and Mathematics, University of Niš, Višegradska 33, 18000 Niš, Serbia.*

\* Corresponding authors: R.D.V.: e-mail, [vuk@kg.ac.rs](mailto:vuk@kg.ac.rs); tel. (+381) 34-30-02-68; fax, (+381) 34-34-50-40. N.S.R.: e-mail, [nikoradulovic@yahoo.com](mailto:nikoradulovic@yahoo.com); tel. (+381) 62-80-49-210; fax, (+381) 18-533-014.

### Table of Contents

|     |                                                                                                                         |       |
|-----|-------------------------------------------------------------------------------------------------------------------------|-------|
| 1   | <sup>1</sup> H and <sup>13</sup> C NMR spectra of compounds <b>4</b> , <b>5</b> and <b>6</b>                            | SI 2  |
| 2   | X-ray crystal structure analyses of <b>6</b>                                                                            | SI 14 |
| 2.1 | Dichlorido-( <i>N,N</i> -diethyl-1-ferrocenyl-3-thiabutanamine)palladium(II) monosolvate ( <b>6</b> ·EtOH), polymorph I | SI 14 |
| 2.2 | Dichlorido-( <i>N,N</i> -diethyl-1-ferrocenyl-3-thiabutanamine)palladium(II) ( <b>6</b> ), polymorph II                 | SI 20 |

# 1 $^1\text{H}$ and $^{13}\text{C}$ NMR spectra of compounds 4, 5 and 6

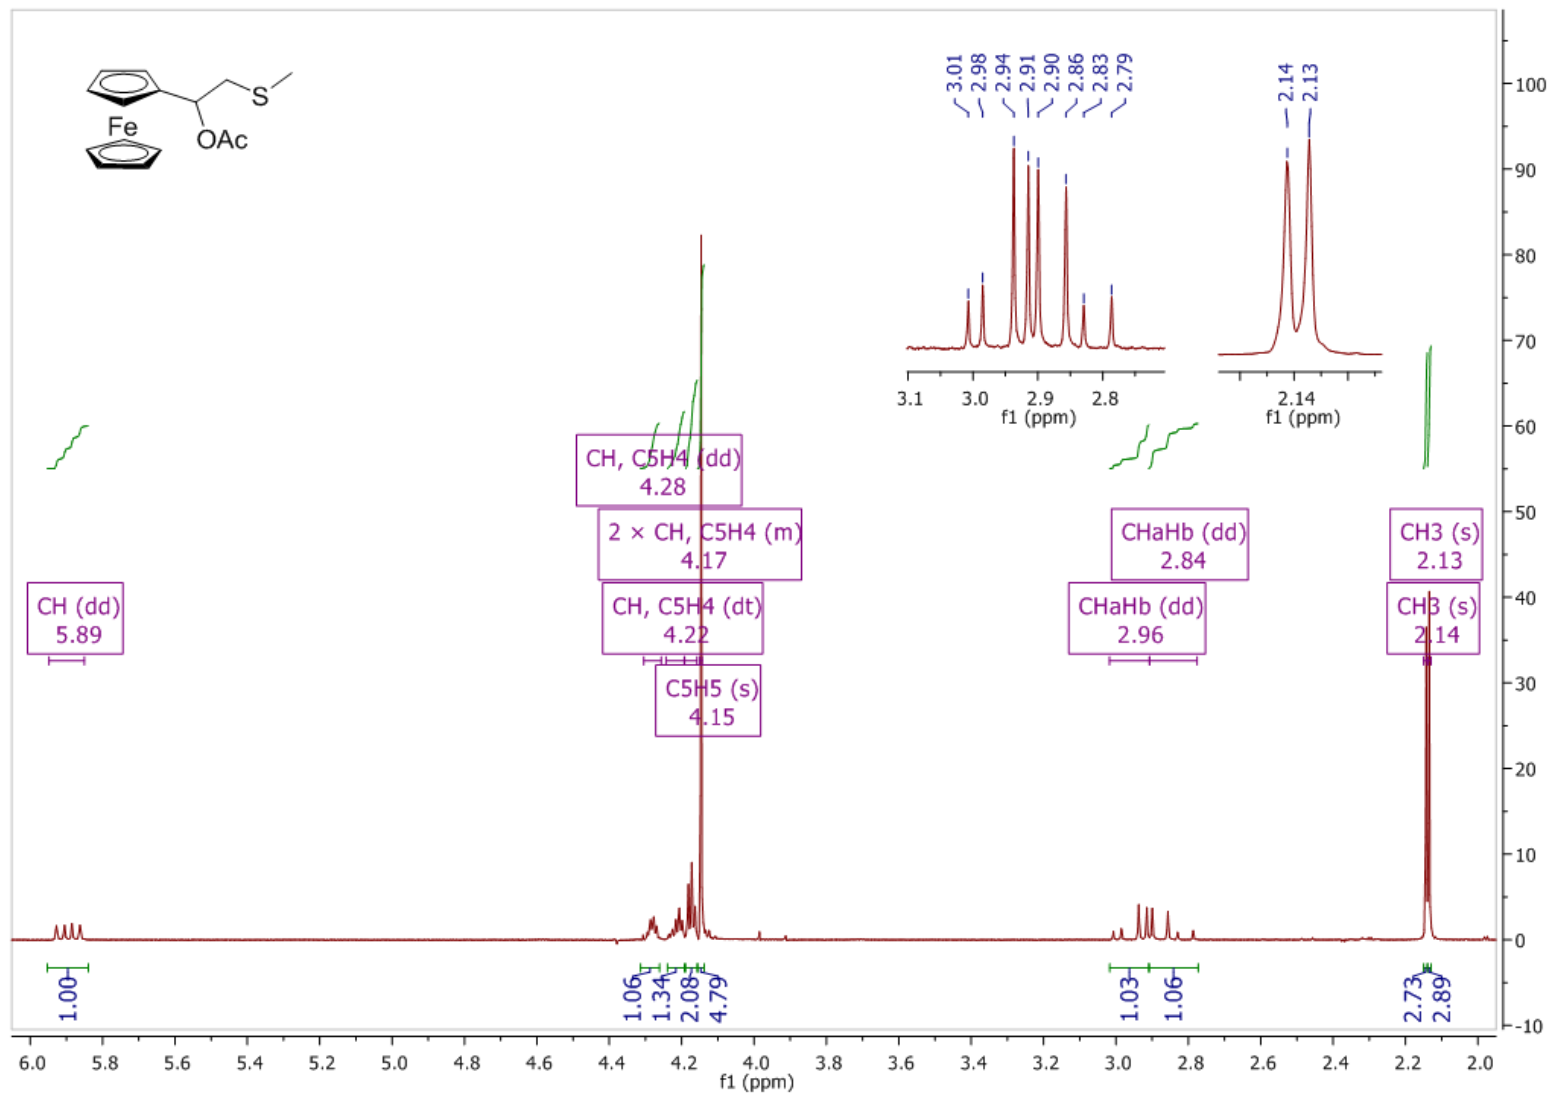

$^1\text{H}$  NMR (200 MHz,  $\text{CDCl}_3$ ) spectrum of 2-(methylthio)-1-ferrocenylethyl acetate (4)

SI 3

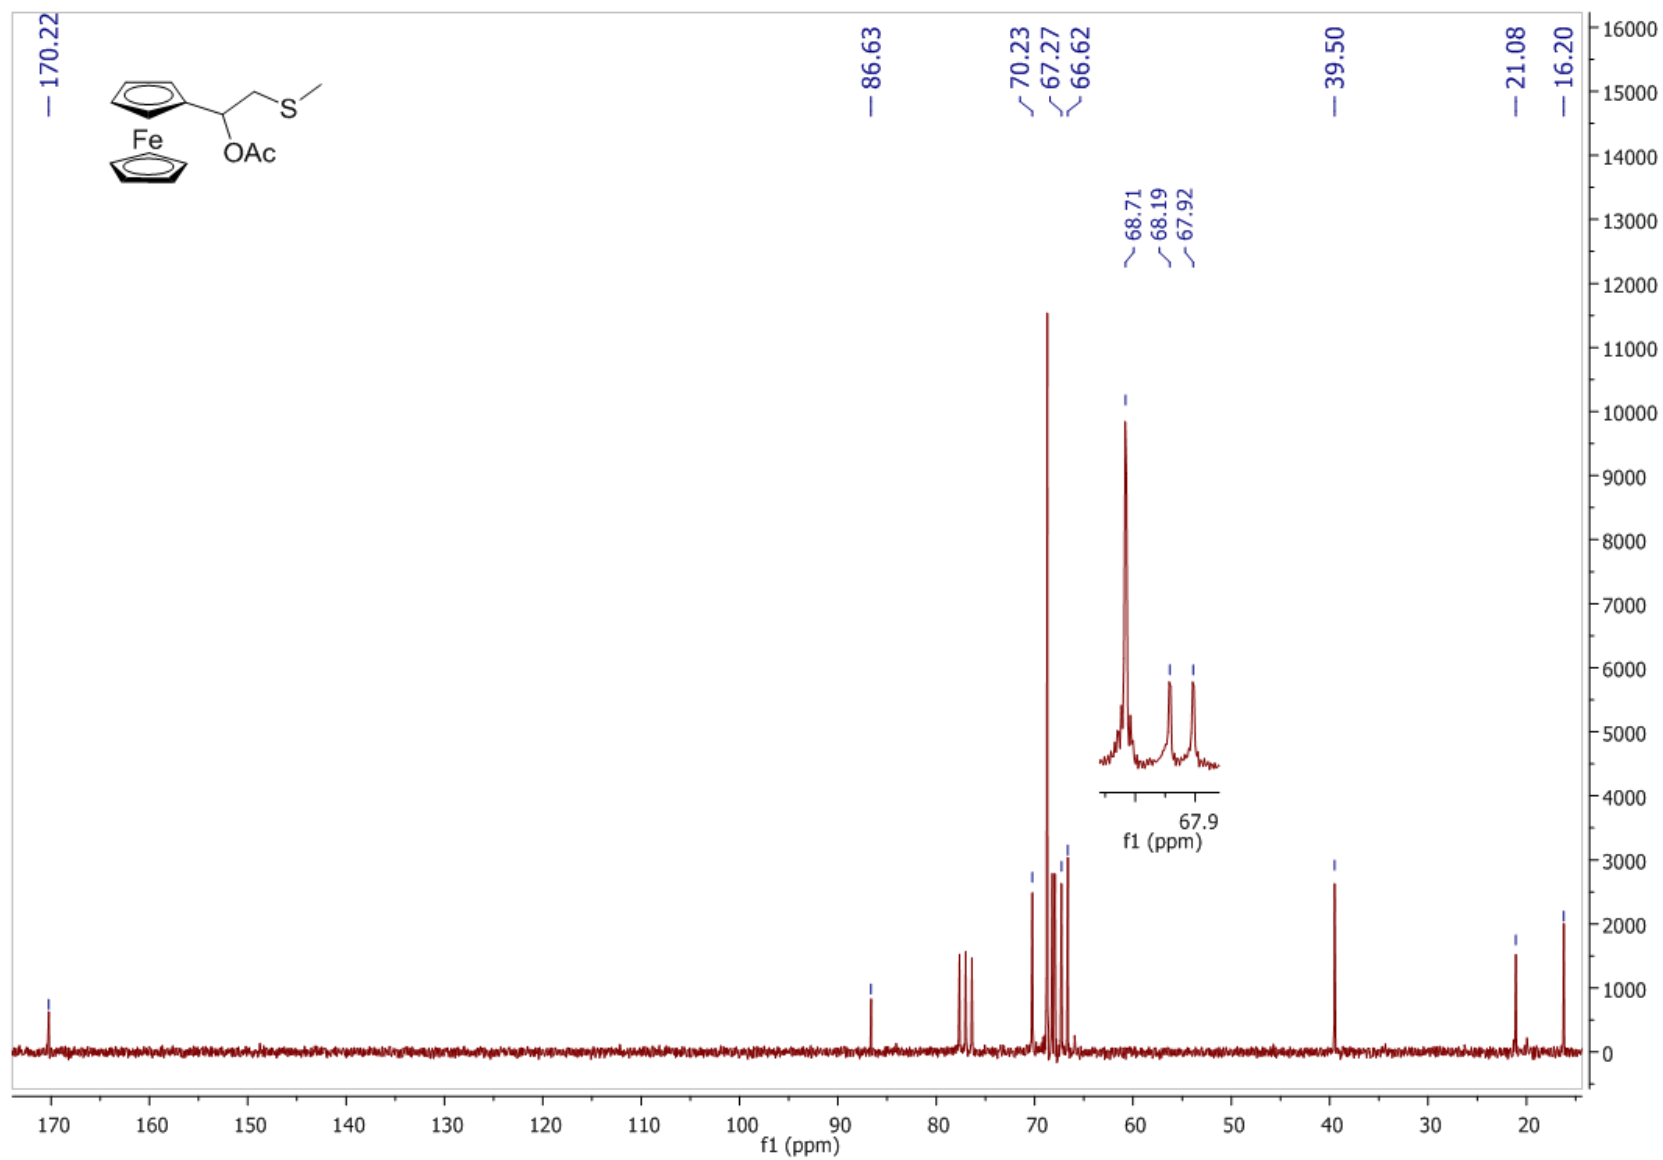

$^{13}\text{C}$  NMR (50 MHz,  $\text{CDCl}_3$ ) spectrum of 2-(methylthio)-1-ferrocenylethyl acetate (**4**)

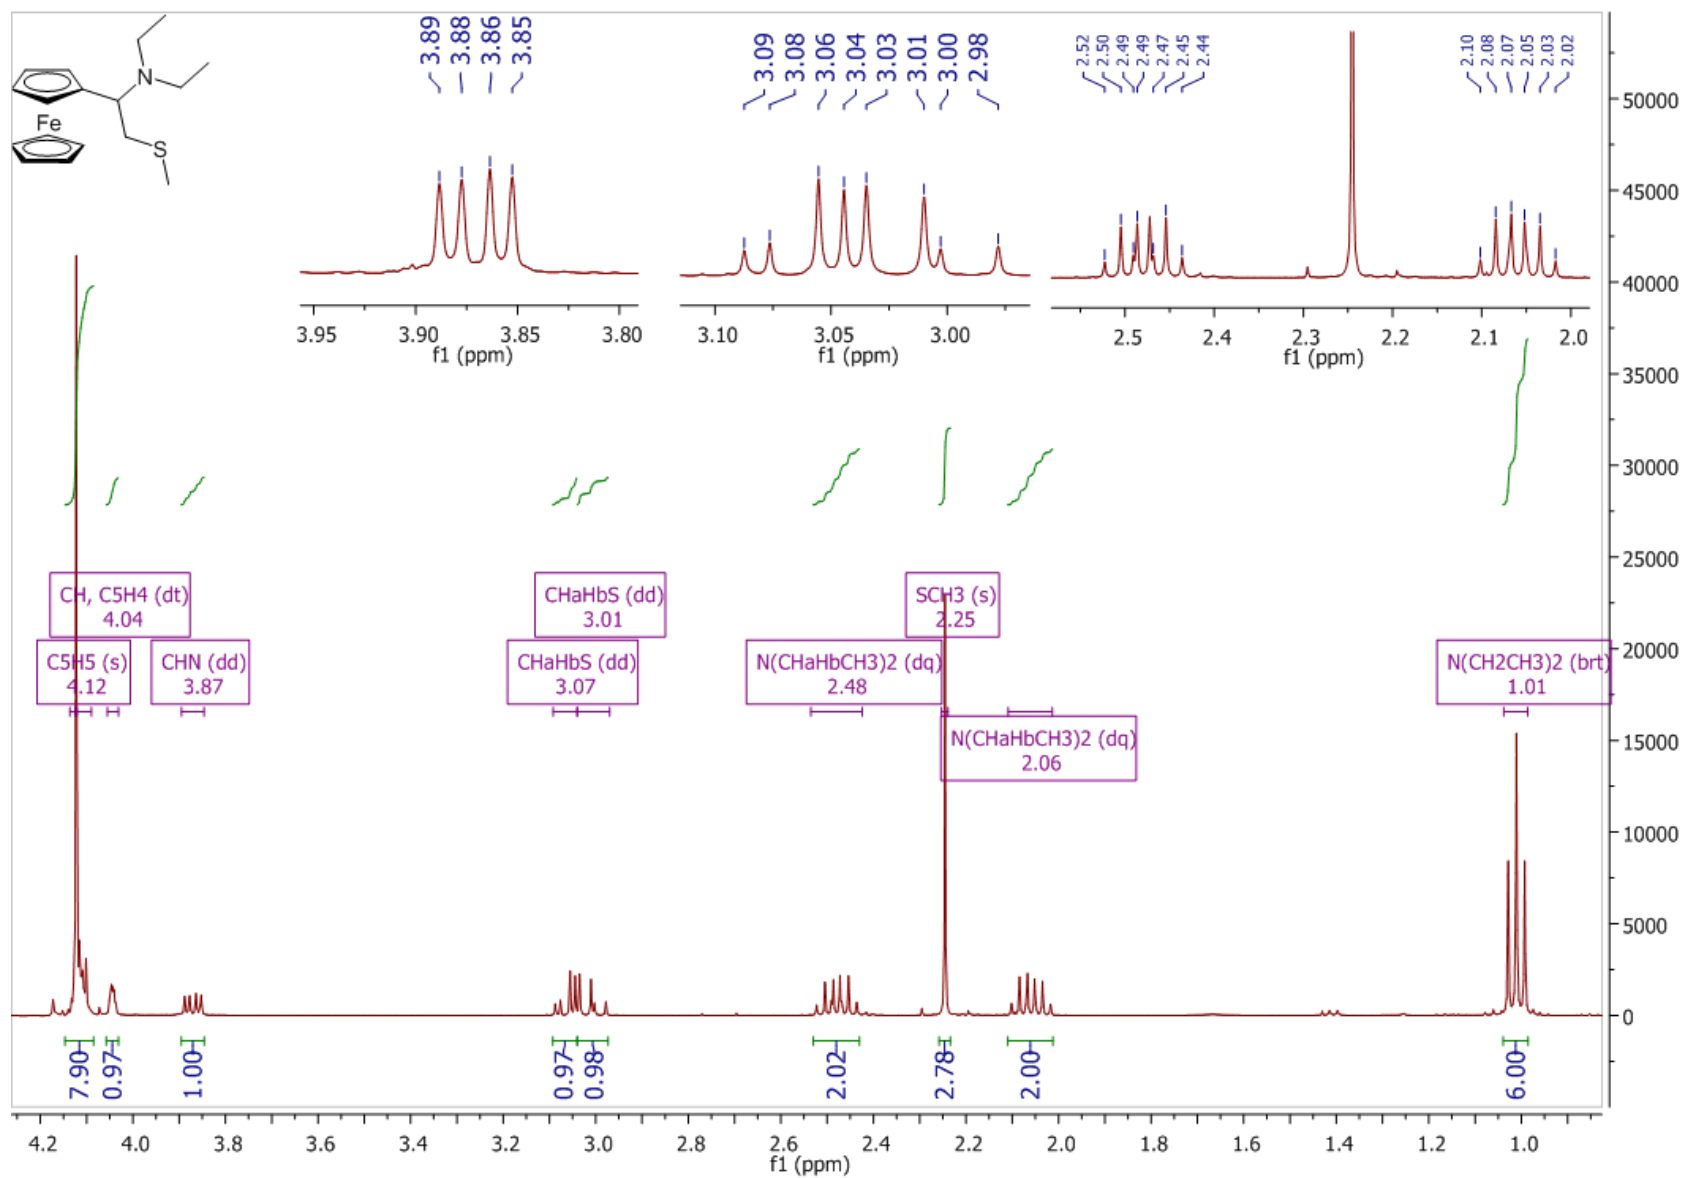

<sup>1</sup>H NMR (400 MHz, CDCl<sub>3</sub>) spectrum of *N,N*-diethyl-1-ferrocenyl-3-thiabutanamine (5)

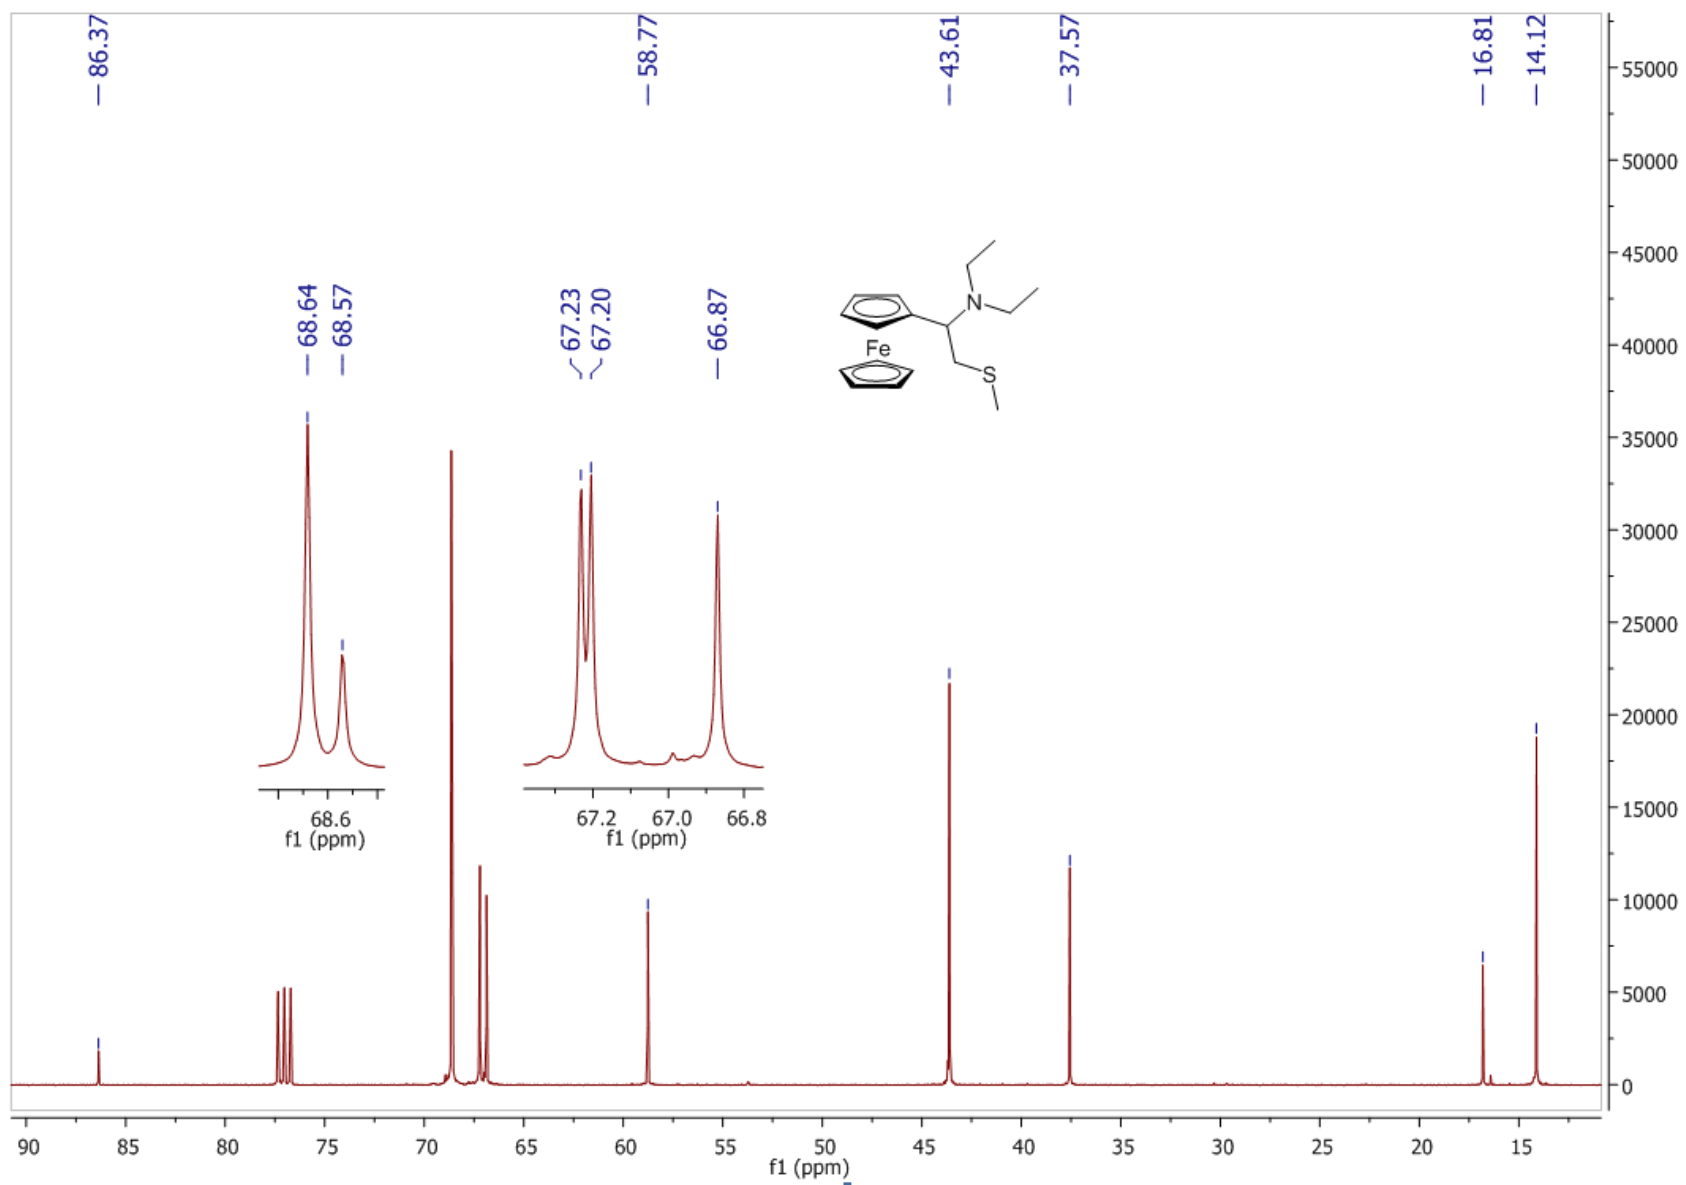

$^{13}\text{C}$  NMR (100 MHz,  $\text{CDCl}_3$ ) spectrum of *N,N*-diethyl-1-ferrocenyl-3-thiobutanamine (**5**)

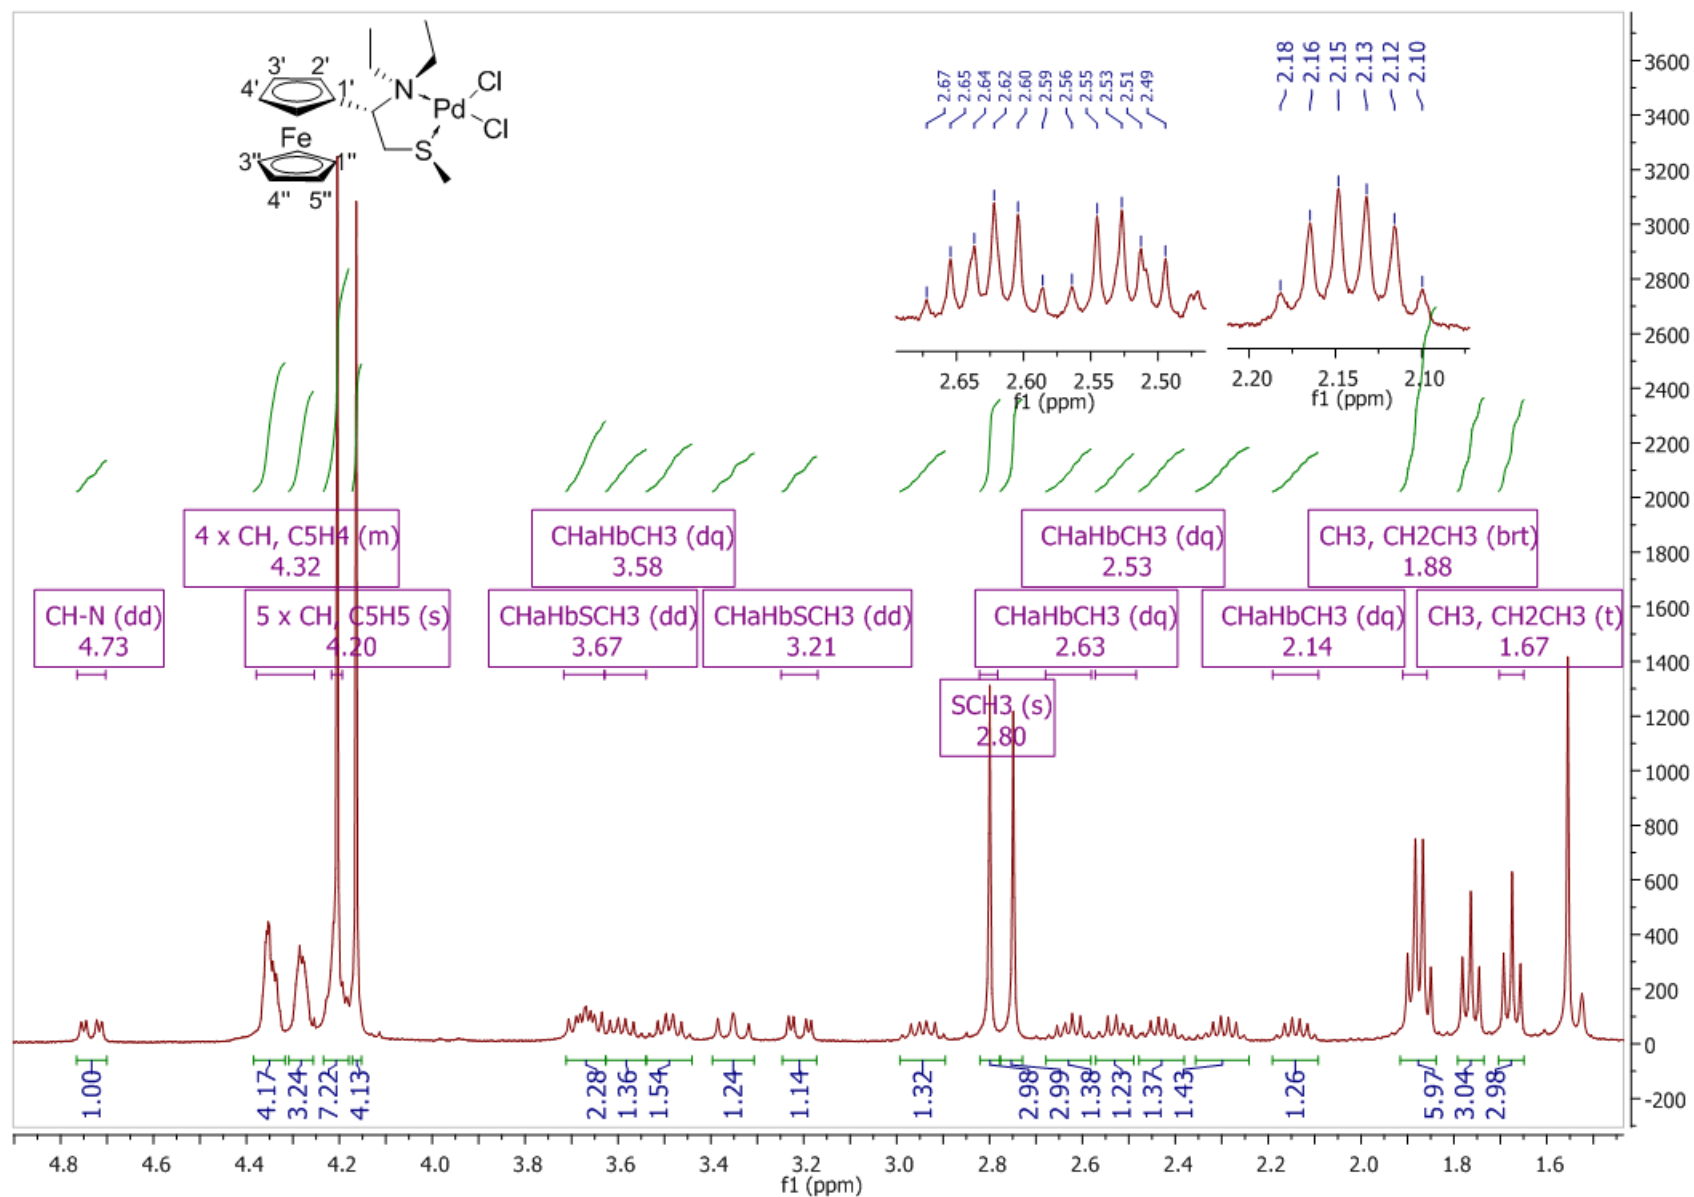

$^1\text{H}$  NMR (400 MHz,  $\text{CDCl}_3$ ) spectrum of *trans*-dichlorido-(*N,N*-diethyl-1-ferrocenyl-3-thiabutanamine)palladium(II) (*trans*-6)

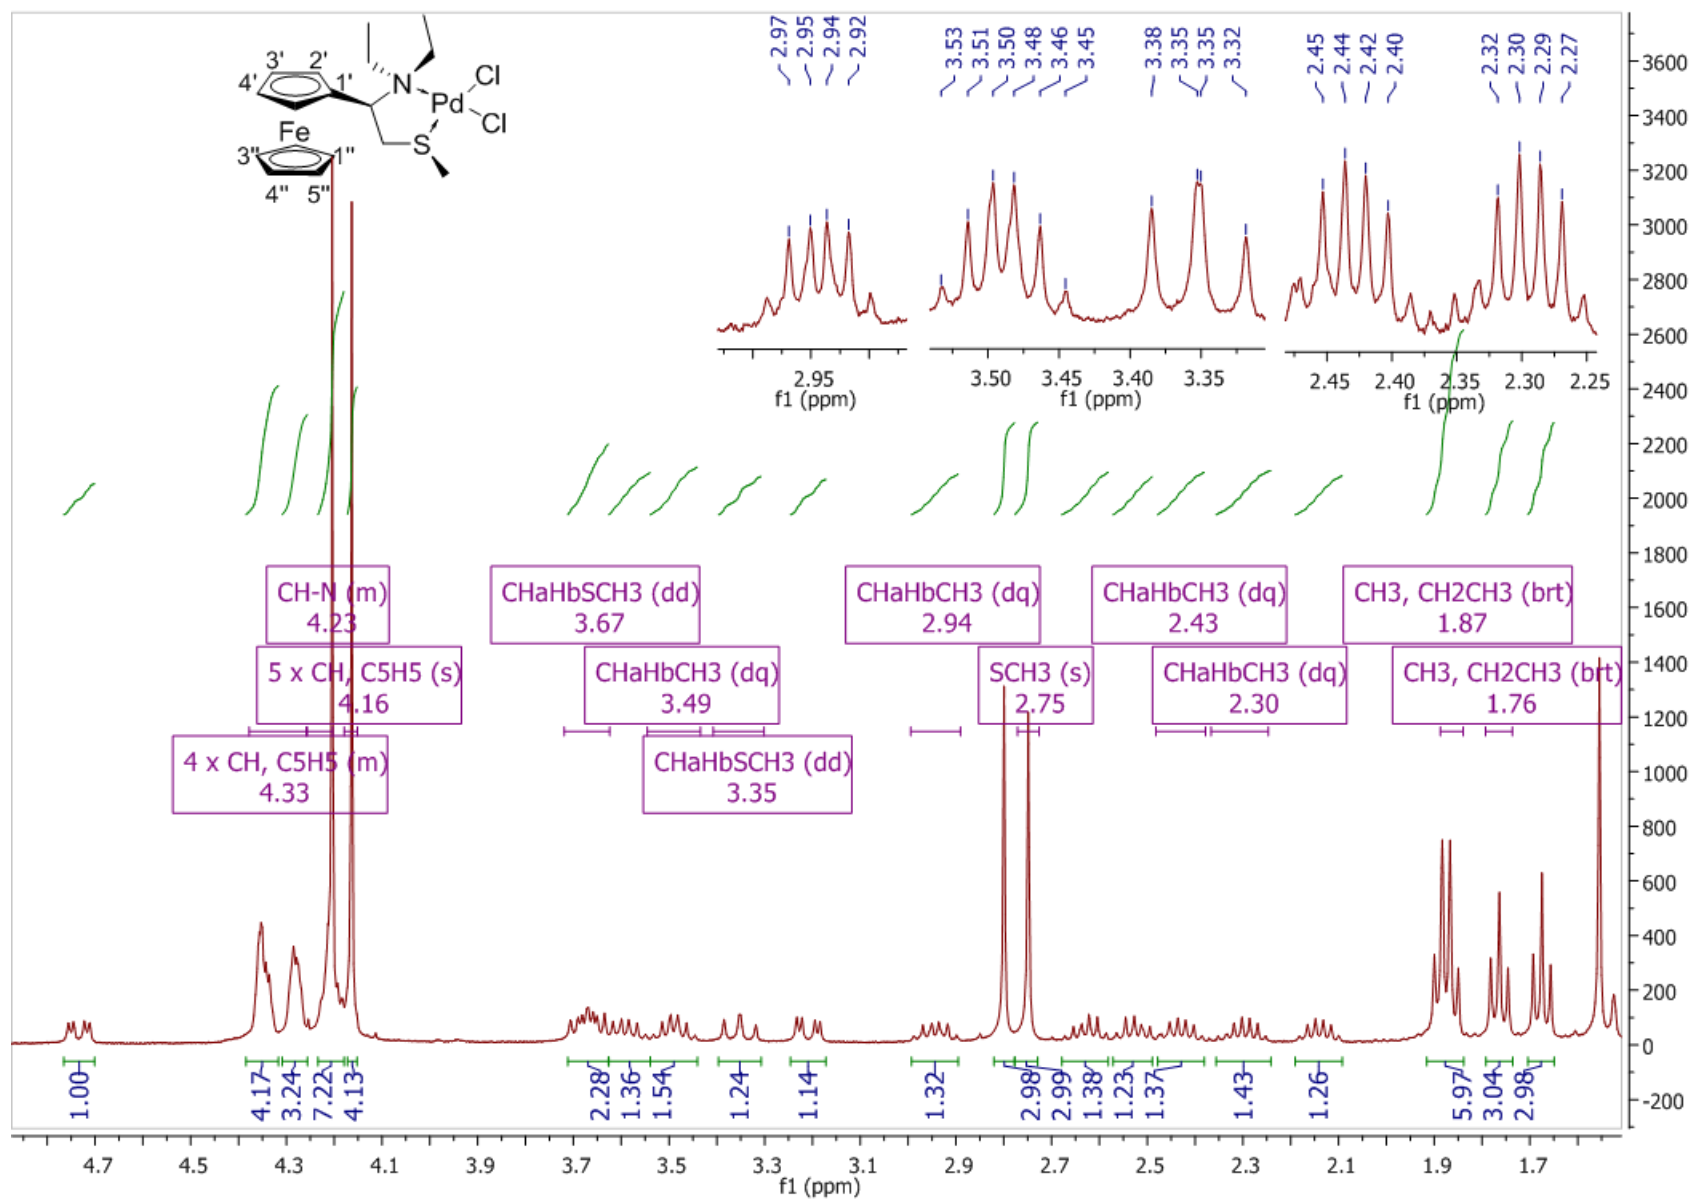

$^1\text{H}$  NMR (400 MHz,  $\text{CDCl}_3$ ) spectrum of *cis*-dichlorido-(*N,N*-diethyl-1-ferrocenyl-3-thiabutanamine)palladium(II) (*cis*-6)

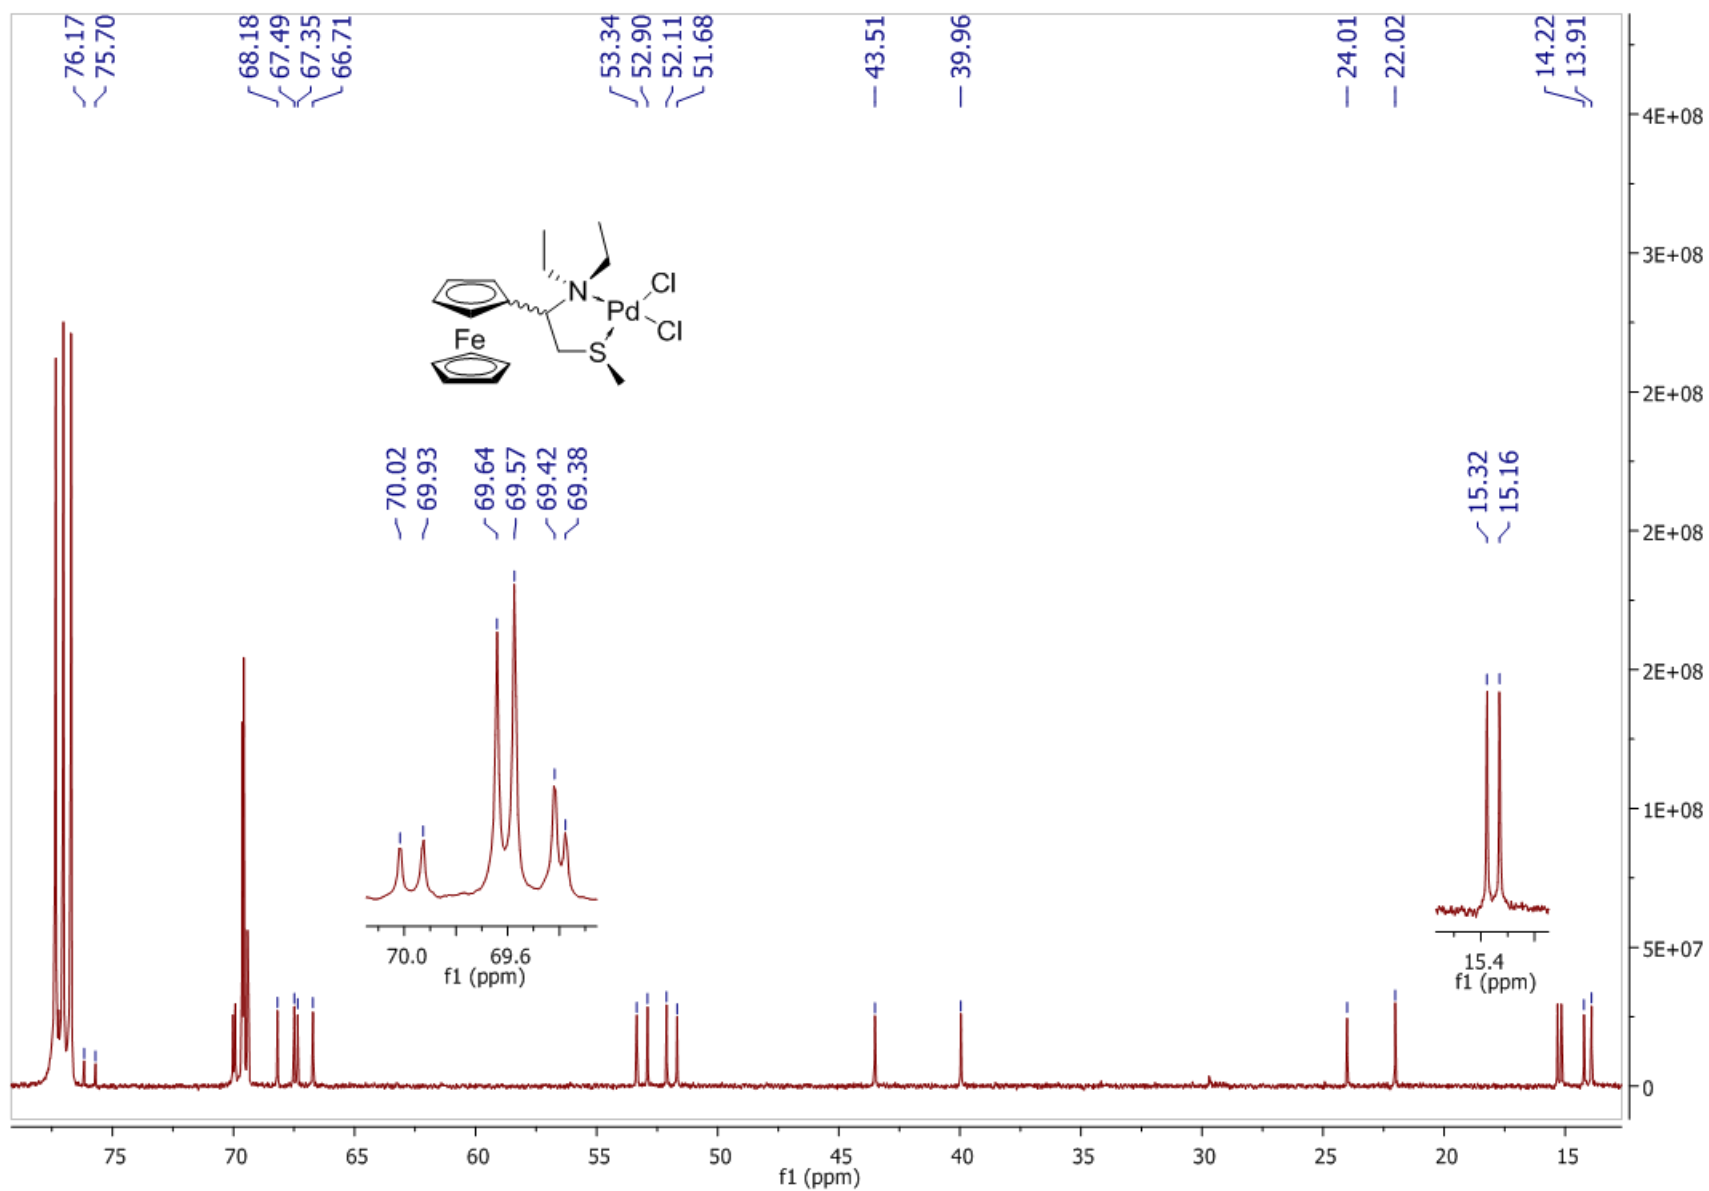

$^{13}\text{C}$  NMR (100 MHz,  $\text{CDCl}_3$ ) spectrum of dichlorido-(*N,N*-diethyl-1-ferrocenyl-3-thiabutamine)palladium(II) (**6**)



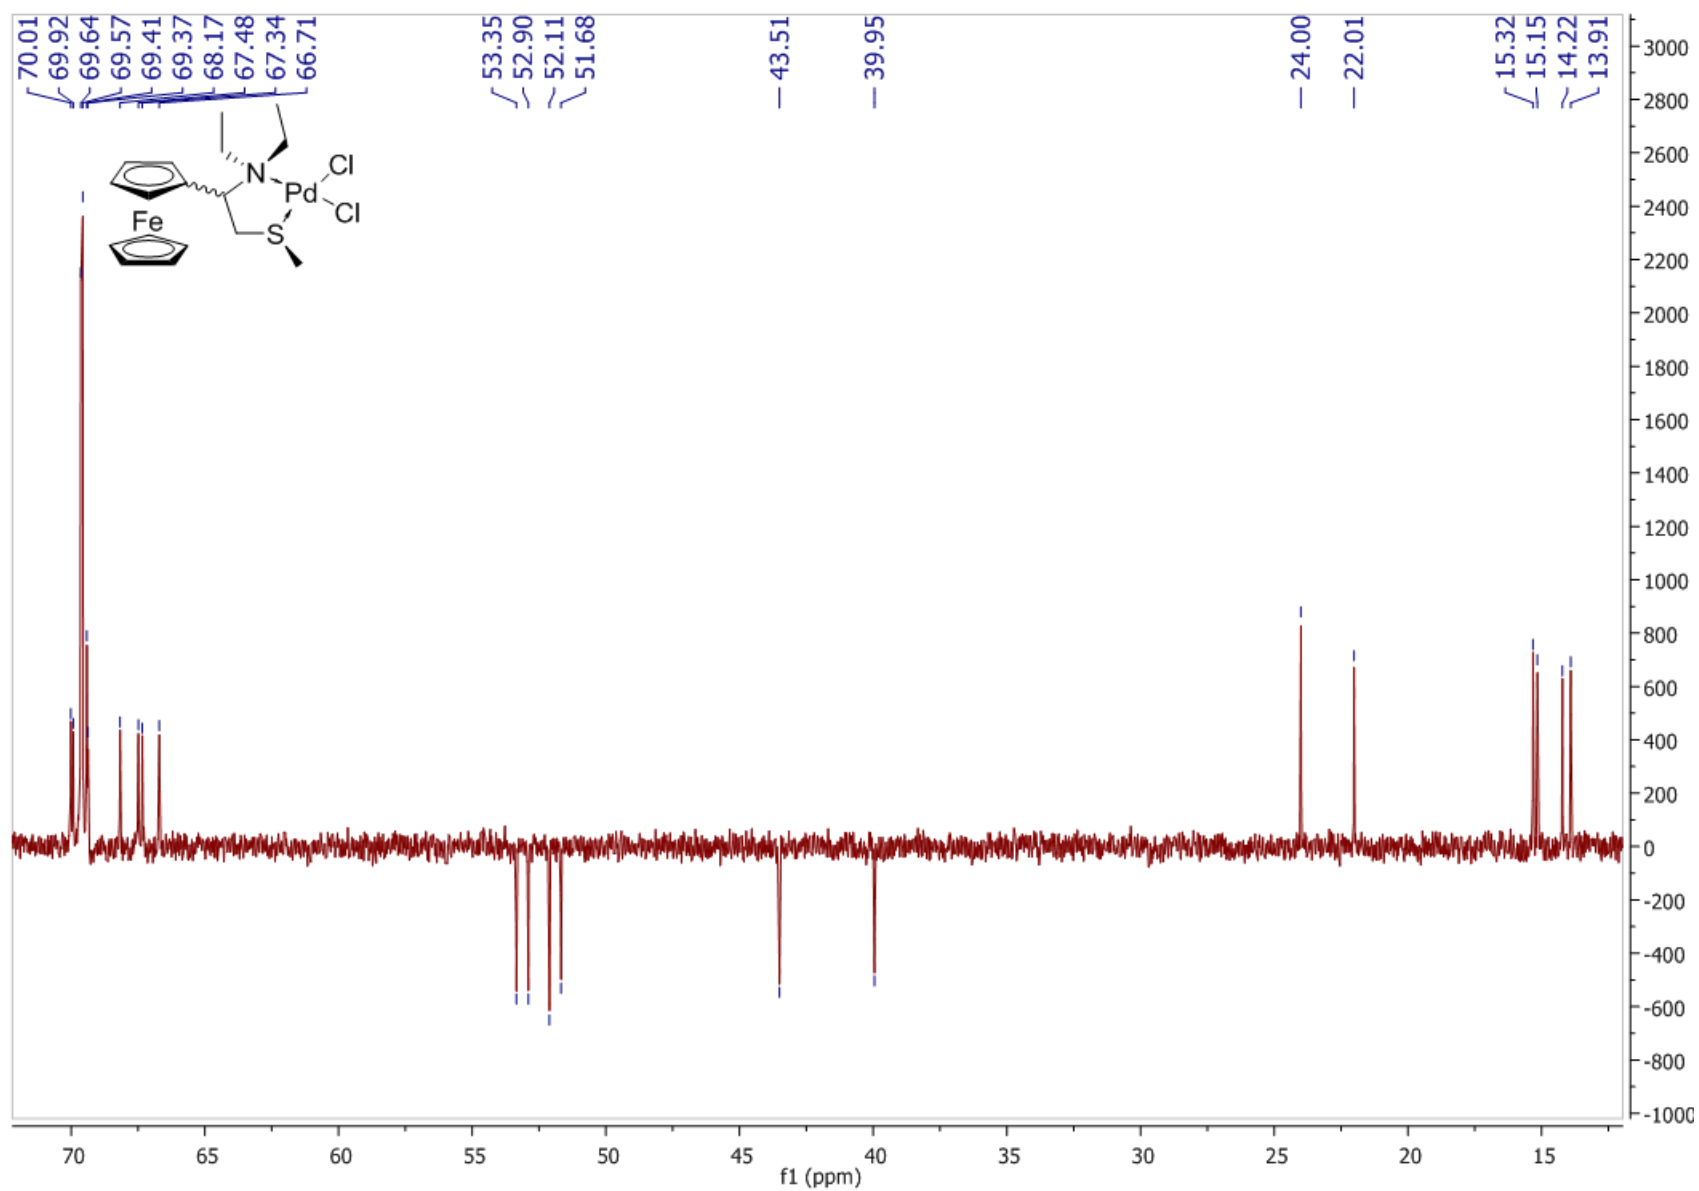

DEPT135 spectrum of dichlorido-(*N,N*-diethyl-1-ferrocenyl-3-thiabutamine)palladium(II) (**6**)

SI 10

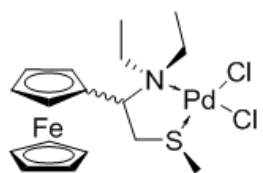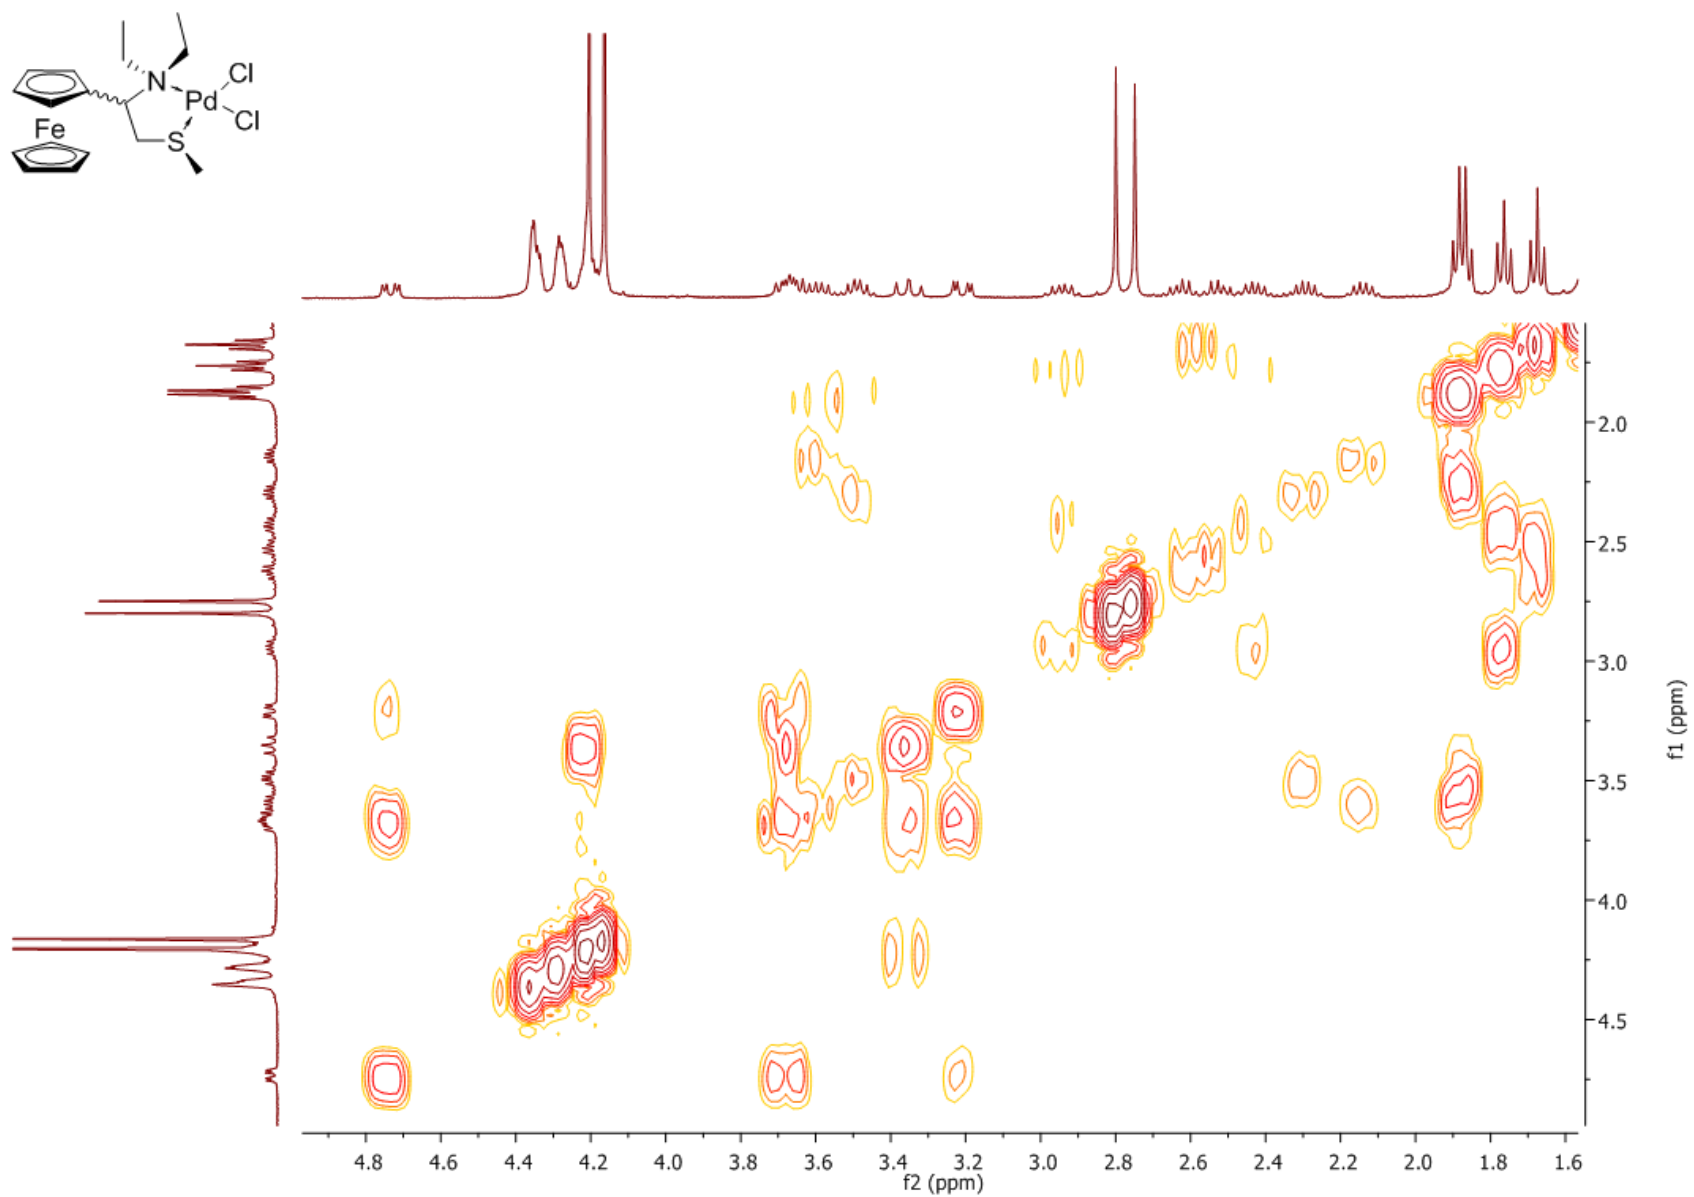

$^1\text{H}$ - $^1\text{H}$  COSY spectrum of dichlorido-(*N,N*-diethyl-1-ferrocenyl-3-thiabutamine)palladium(II) (**6**)

SI 11

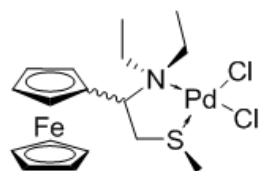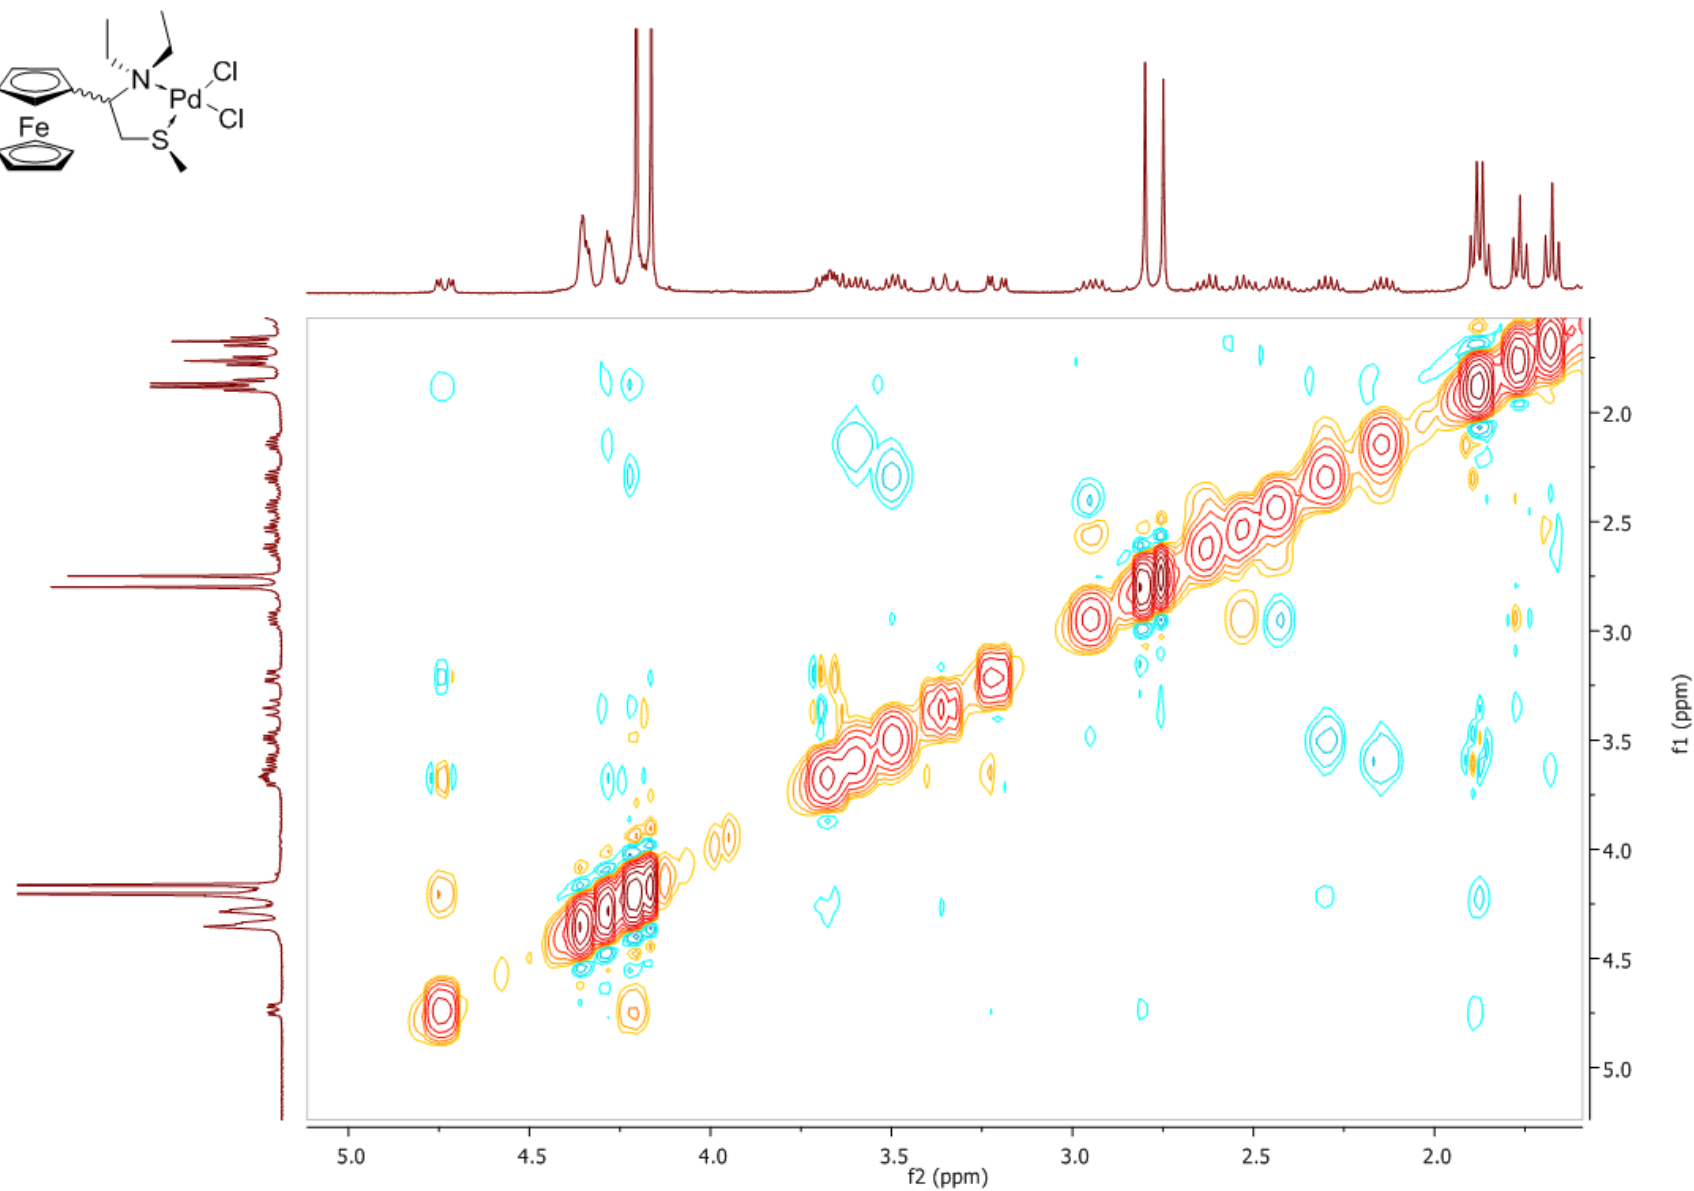

NOESY spectrum of dichlorido-(*N,N*-diethyl-1-ferrocenyl-3-thiabutanamine)palladium(II) (**6**)

SI 12

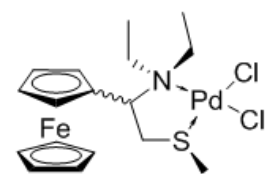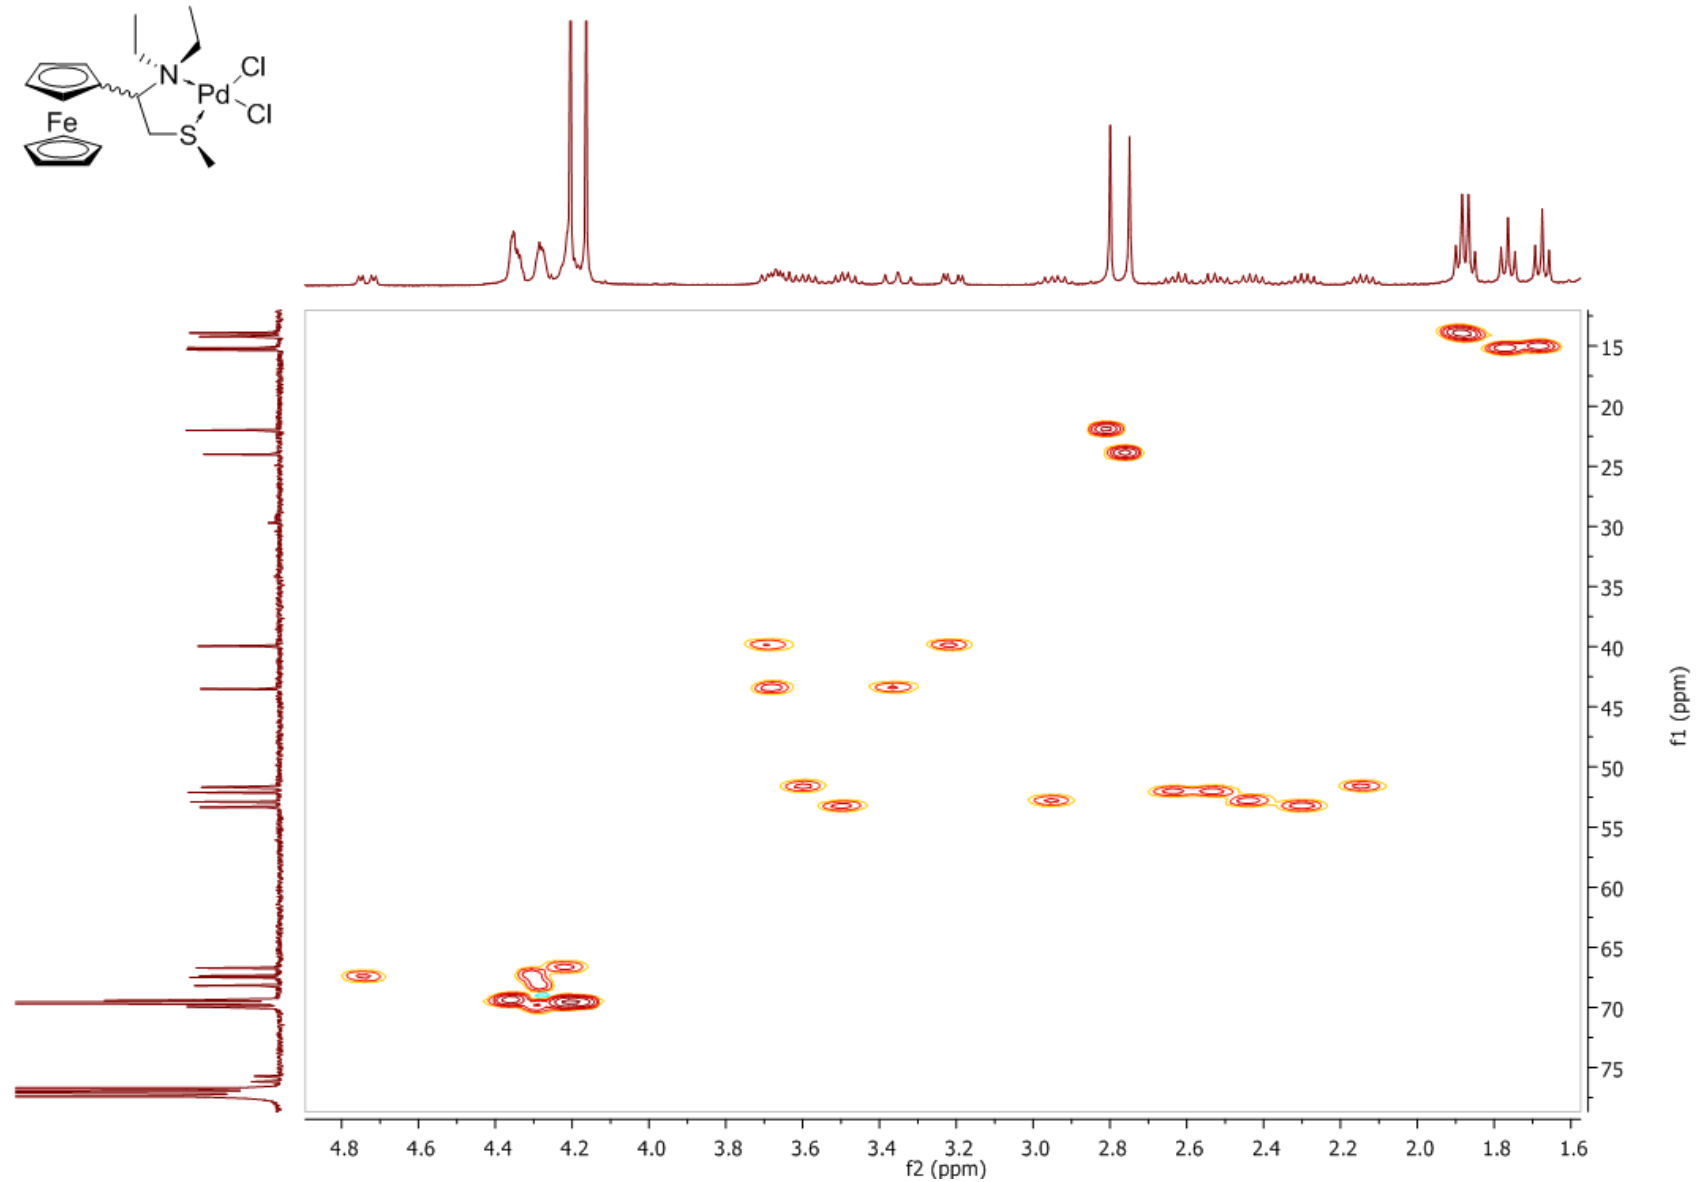

HSQC spectrum of dichlorido-(*N,N*-diethyl-1-ferrocenyl-3-thiabutamine)palladium(II) (**6**)

SI 13

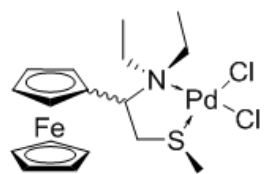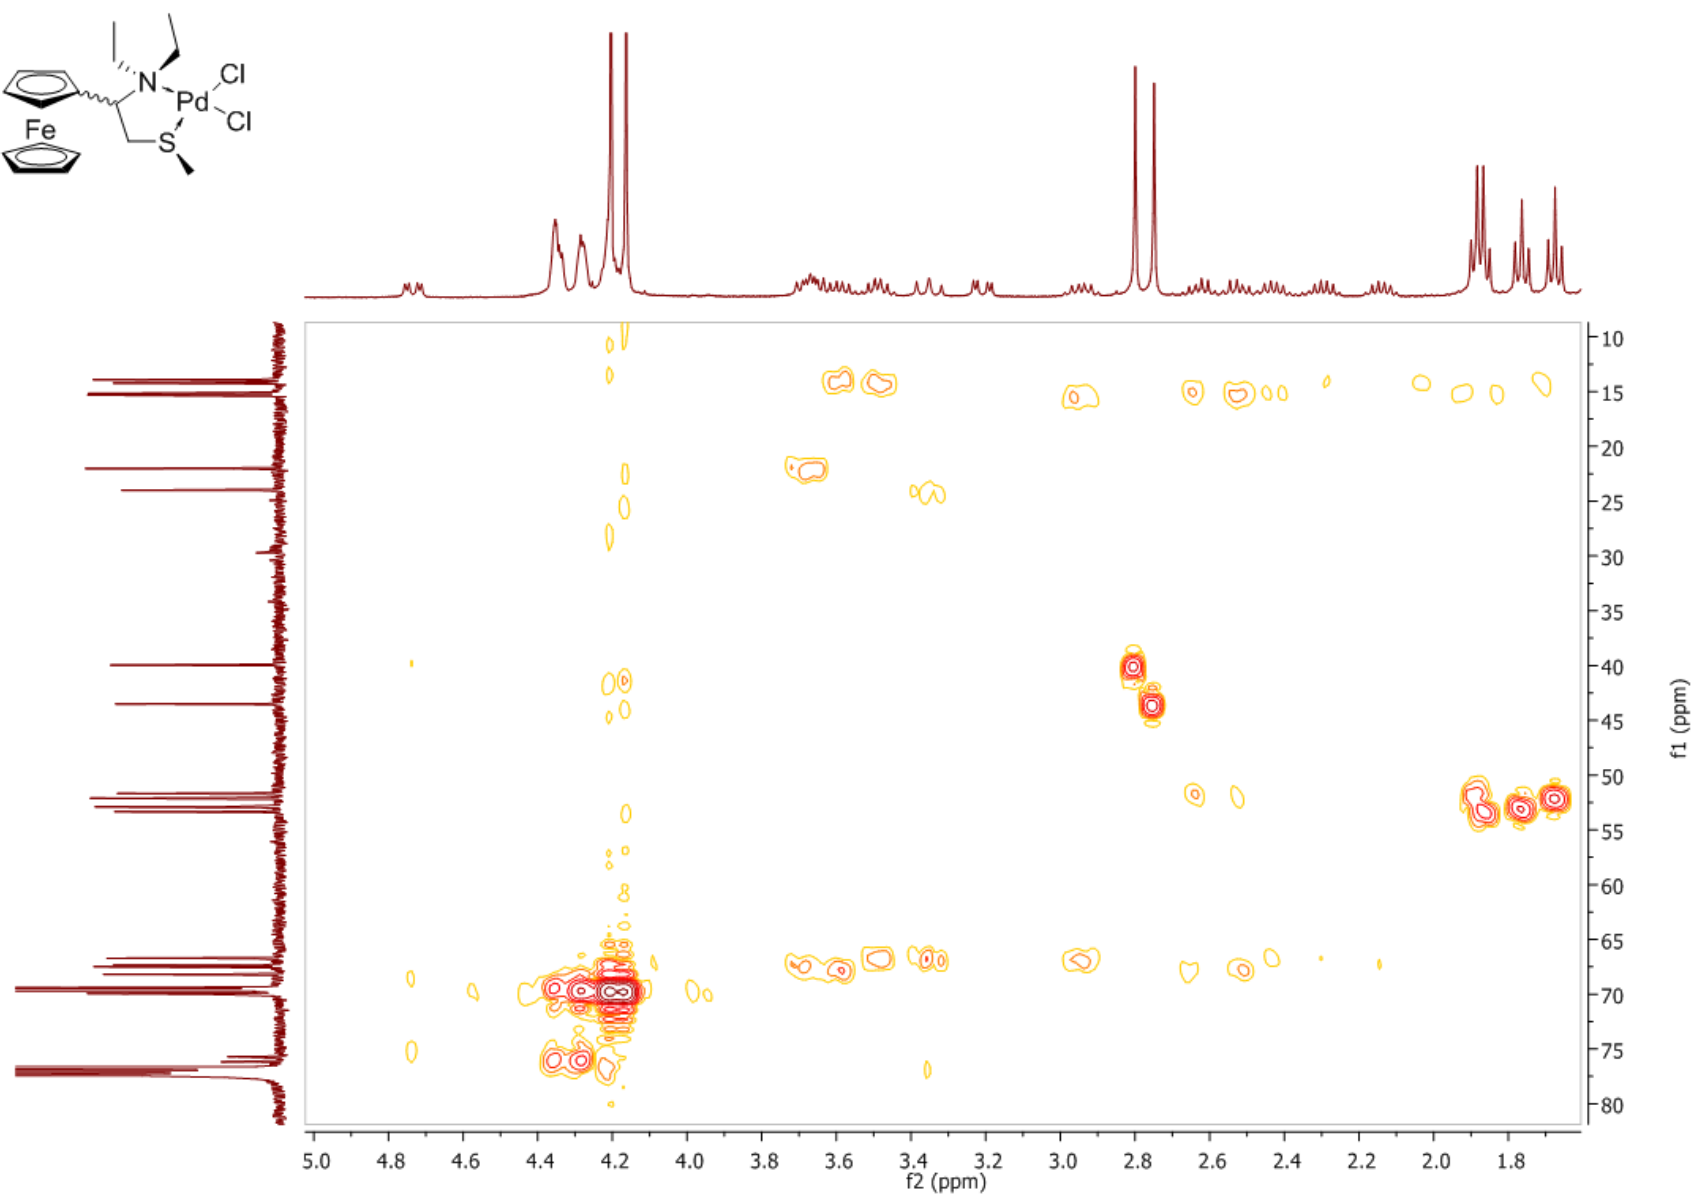

HMBC spectrum of dichlorido-(*N,N*-diethyl-1-ferrocenyl-3-thiabutanamine)palladium(II) (**6**)

## 2 X-ray crystal structure analyses of 6

### 2.1 Dichlorido-(*N,N*-diethyl-1-ferrocenyl-3-thiabutamine)palladium(II) monosolvate (6·EtOH), polymorph I

**Table S3** Crystallographic data for the crystal structure of 6·EtOH

|                                                                                                            |                                                               |
|------------------------------------------------------------------------------------------------------------|---------------------------------------------------------------|
| Empirical formula                                                                                          | C <sub>19</sub> H <sub>31</sub> Cl <sub>2</sub> Fe N O Pd S   |
| Formula weight                                                                                             | 554.66                                                        |
| Color, crystal shape                                                                                       | Dark red, prismatic                                           |
| Crystal size (mm <sup>3</sup> )                                                                            | 0.50 x 0.21 x 0.12                                            |
| Temperature (K)                                                                                            | 293(2)                                                        |
| Wavelength (Å)                                                                                             | 0.71073                                                       |
| Crystal system                                                                                             | Monoclinic                                                    |
| Space group                                                                                                | <i>P2<sub>1</sub>/n</i>                                       |
| Unit cell dimensions                                                                                       |                                                               |
| <i>a</i> (Å)                                                                                               | 11.8670(4)                                                    |
| <i>b</i> (Å)                                                                                               | 14.7863(4)                                                    |
| <i>c</i> (Å)                                                                                               | 13.4527(6)                                                    |
| $\beta$ (°)                                                                                                | 105.836(5)                                                    |
| Volume (Å <sup>3</sup> )                                                                                   | 2270.94(14)                                                   |
| <i>Z</i>                                                                                                   | 4                                                             |
| <i>D</i> <sub>calc</sub> (Mg/m <sup>3</sup> )                                                              | 1.622                                                         |
| $\mu$ (mm <sup>-1</sup> )                                                                                  | 1.766                                                         |
| F(000)                                                                                                     | 1128                                                          |
| $\theta$ range for data collection (°)                                                                     | 3.17 – 29.68                                                  |
| Index ranges                                                                                               | -16 ≤ <i>h</i> ≤ 16, -20 ≤ <i>k</i> ≤ 20, -18 ≤ <i>l</i> ≤ 18 |
| Reflections collected                                                                                      | 33237                                                         |
| Independent reflections, <i>R</i> <sub>int</sub>                                                           | 5858, 0.0413                                                  |
| Completeness to $\theta = 27.00^\circ$                                                                     | 99.8 %                                                        |
| Refinement method                                                                                          | Full-matrix least-squares on F <sup>2</sup>                   |
| Data / restraints / parameters                                                                             | 5858 / 0 / 238                                                |
| Goodness-of-fit on F <sup>2</sup>                                                                          | 1.151                                                         |
| Final <i>R</i> <sub>1</sub> / <i>wR</i> <sub>2</sub> indices ( <i>I</i> > 2 $\sigma$ <sub><i>I</i></sub> ) | 0.0506, 0.0969                                                |
| Final <i>R</i> <sub>1</sub> / <i>wR</i> <sub>2</sub> indices (all data)                                    | 0.0667, 0.1037                                                |
| Largest diff. peak and hole (e Å <sup>-3</sup> )                                                           | 0.759 and -0.402                                              |

**Table S4** Selected bond lengths (Å) and bond angles (°) in the crystal structure of **6**·EtOH.

| b o n   | b o n       |
|---------|-------------|
| Pd1–N1  | N1–Pd1–S1   |
| Pd1–S1  | N1–Pd1–C11  |
| Pd1–C11 | S1–Pd1–C11  |
| Pd1–C12 | N1–Pd1–C12  |
| Fel–C9  | S1–Pd1–C12  |
| Fel–C8  | C11–Pd1–C12 |
| Fel–C7  | C12–S1–C13  |
| Fel–C2  | C12–S1–Pd1  |
| Fel–C10 | C13–S1–Pd1  |
| Fel–C4  | C16–N1–C14  |
| Fel–C5  | C16–N1–C11  |
| Fel–C6  | C14–N1–C11  |
| Fel–C3  | C16–N1–Pd1  |
| Fel–C1  | C14–N1–Pd1  |
| S1–C12  | C11–N1–Pd1  |
| S1–C13  | C5–C1–C2    |
| N1–C16  | C5–C1–C11   |
| N1–C14  | C2–C1–C11   |
| N1–C11  | C1–C2–C3    |
| C1–C5   | C4–C3–C2    |
| C1–C2   | C3–C4–C5    |
| C1–C11  | C4–C5–C1    |
| C2–C3   | C10–C6–C7   |
| C3–C4   | C8–C7–C6    |
| C4–C5   | C9–C8–C7    |
| C6–C10  | C8–C9–C10   |
| C6–C7   | C6–C10–C9   |
| C7–C8   | C12–C11–C1  |
| C8–C9   | C12–C11–N1  |
| C9–C10  | C1–C11–N1   |
| C11–C12 | C11–C12–S1  |
| C14–C15 | C15–C14–N1  |
| C16–C17 | C17–C16–N1  |
| O1–C18  | C19–C18–O1  |
| C18–C19 |             |

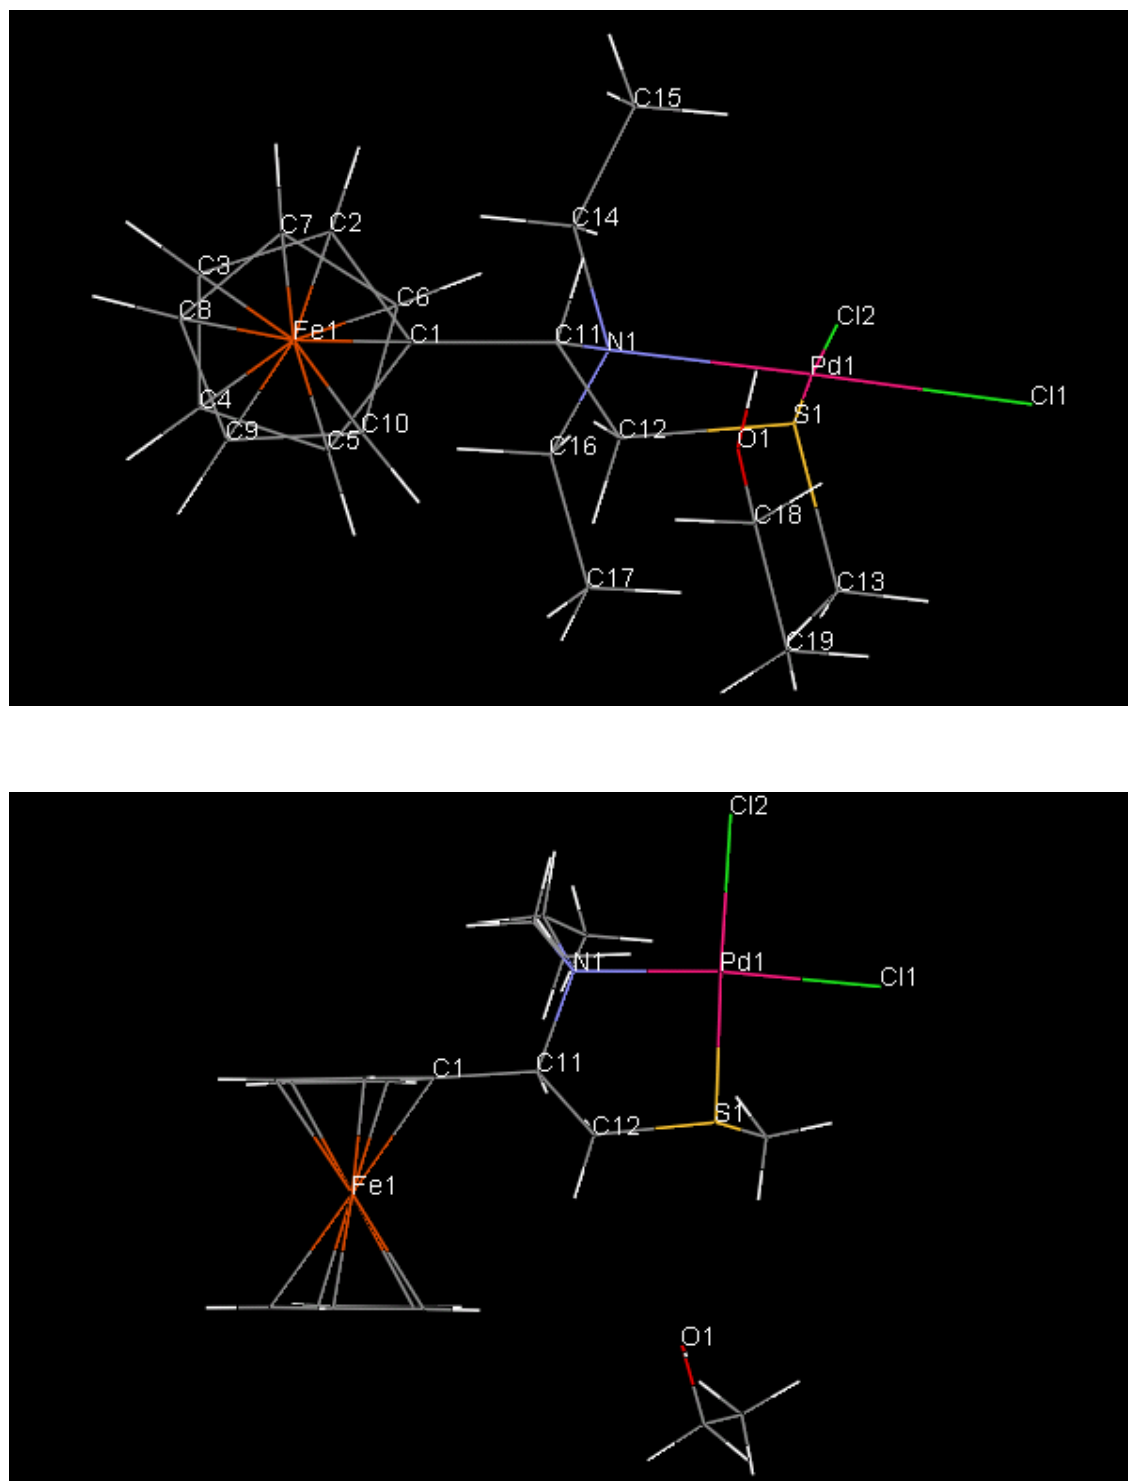

**Fig. S1** Crystal structure of 6·EtOH shown in two orthogonal projections.



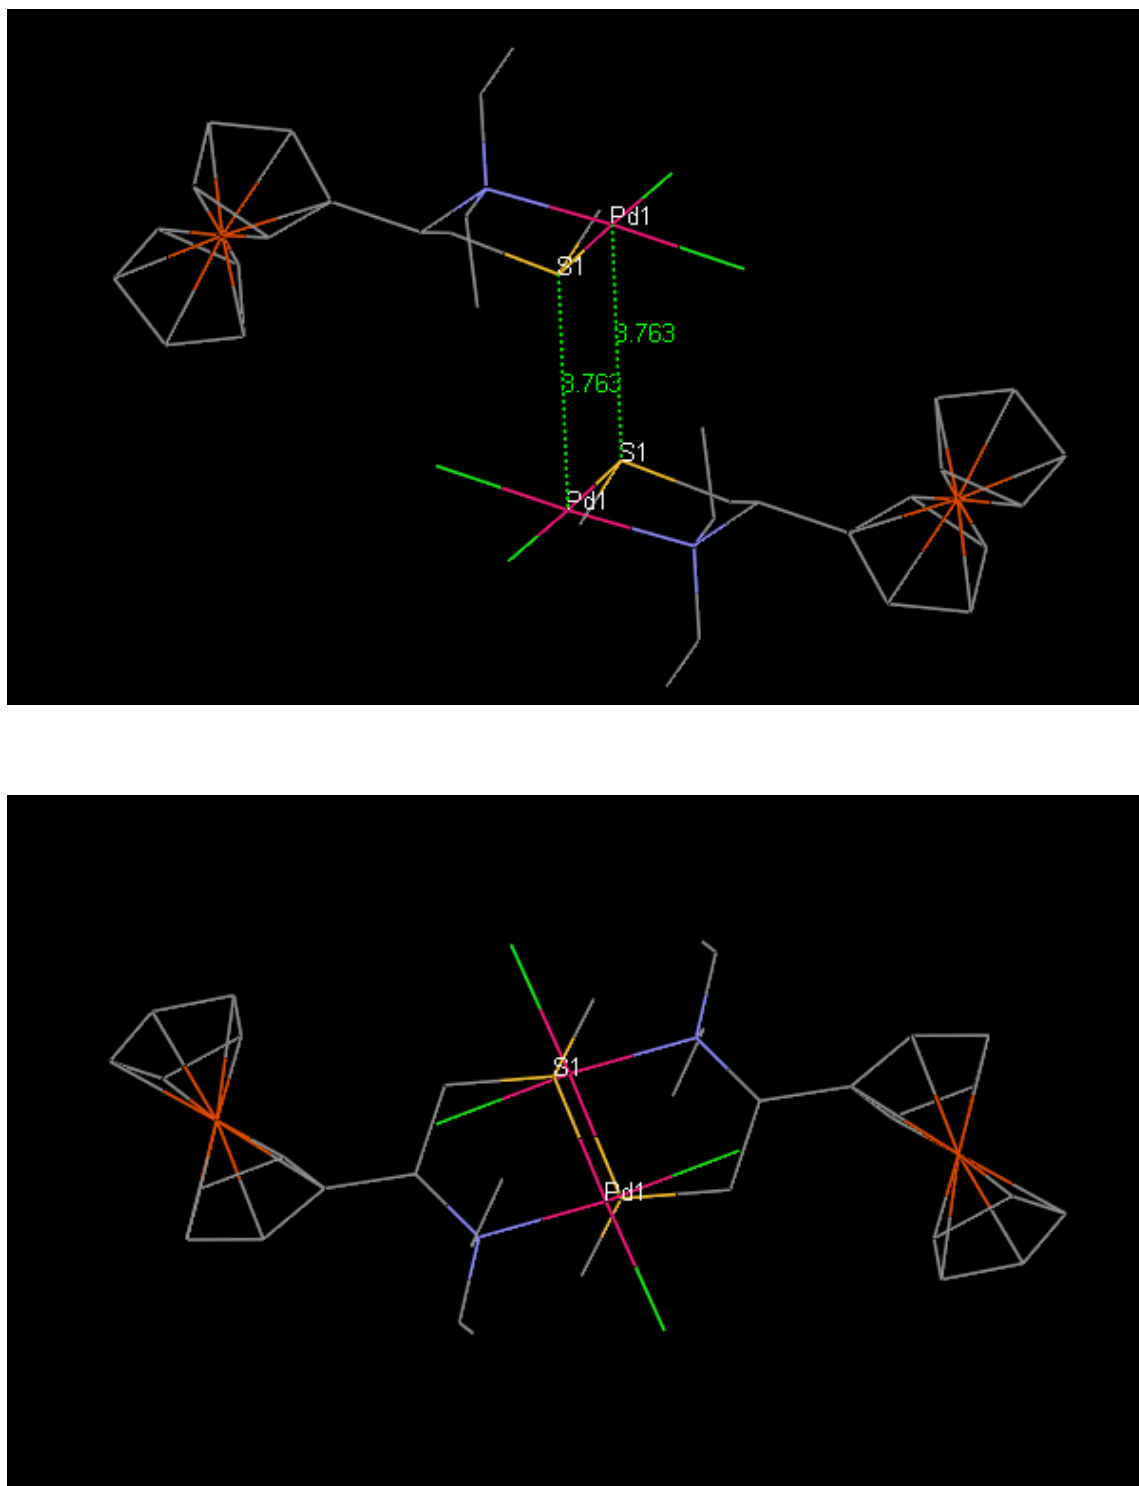

**Fig. S2** Molecules of **6** form a dimer (illustrated in two orthogonal projections) with two Pd1...S1<sup>i</sup> intermolecular contacts [symmetry code: (i)  $-x+1, -y+1, -z+2$ ]. The Pd1...S1<sup>i</sup> distance is 3.7633(10) Å.

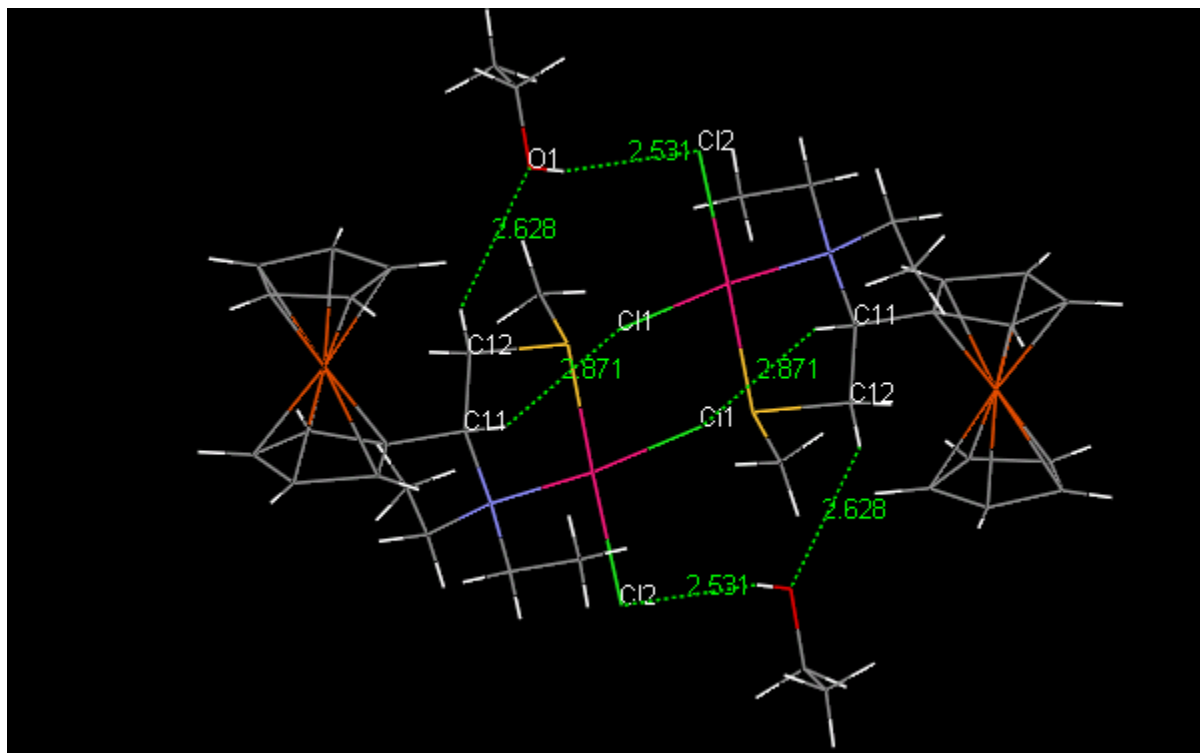

**Fig. S3** Two molecules of **6** within the dimer shown in Figure S2 are additionally interconnected by following weak intermolecular interactions: a) C12–H12b...O1 [C12...O1 = 3.302(6) Å, H12b...O1 = 2.63 Å, C12–H12b...O1 = 126.8 °], b) C11–H11...C11 [C11...C11 = 3.741(4) Å, H11...C11 = 2.87 Å, C11–H11...C11 = 148.3 °] and c) O1–H1...C12 [O1...C12 = 3.321(5) Å, H1...C12 = 2.53 Å, O1–H1...C12 = 154.8 °].

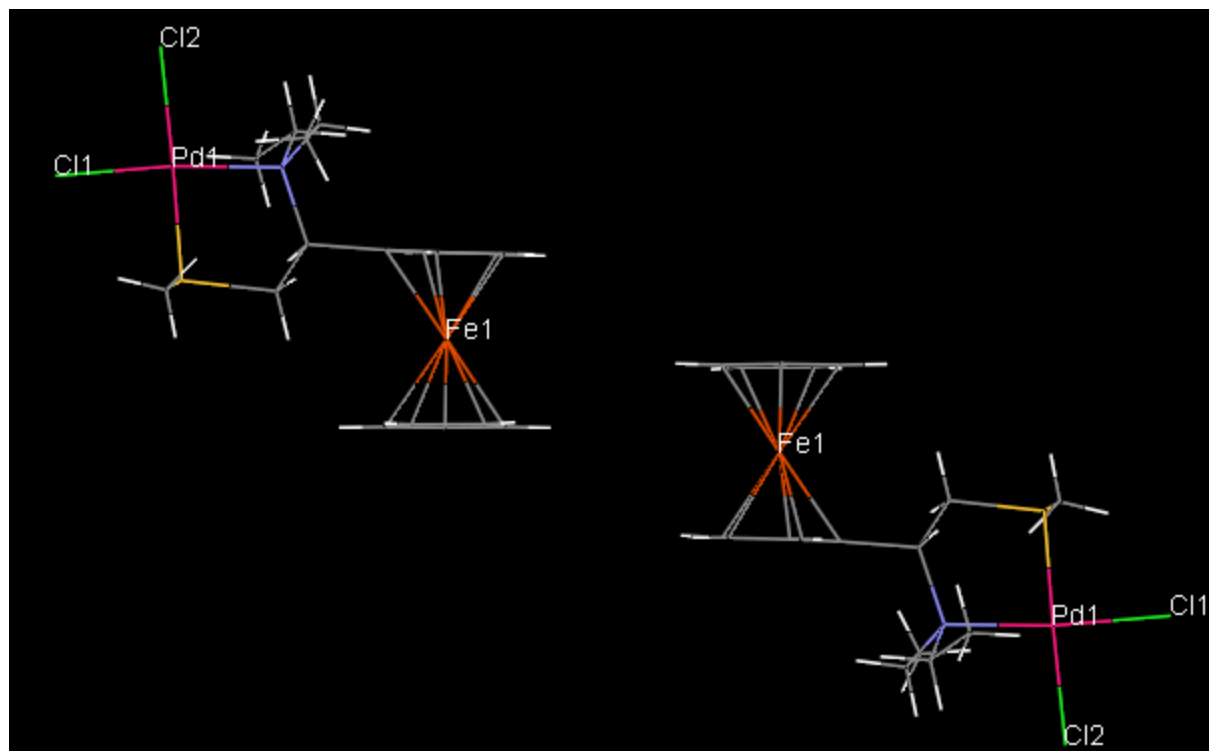

**Fig. S4** Molecules of **6** form the dimer with two ferrocene units placed in parallel orientation and direct contact. The formation of the dimer is based on a large stabilizing electrostatic complementarity between two ferrocene units<sup>9</sup>.

## 2.2 Dichlorido-(*N,N*-diethyl-1-ferrocenyl-3-thiabutamine)palladium(II) (6), polymorph II

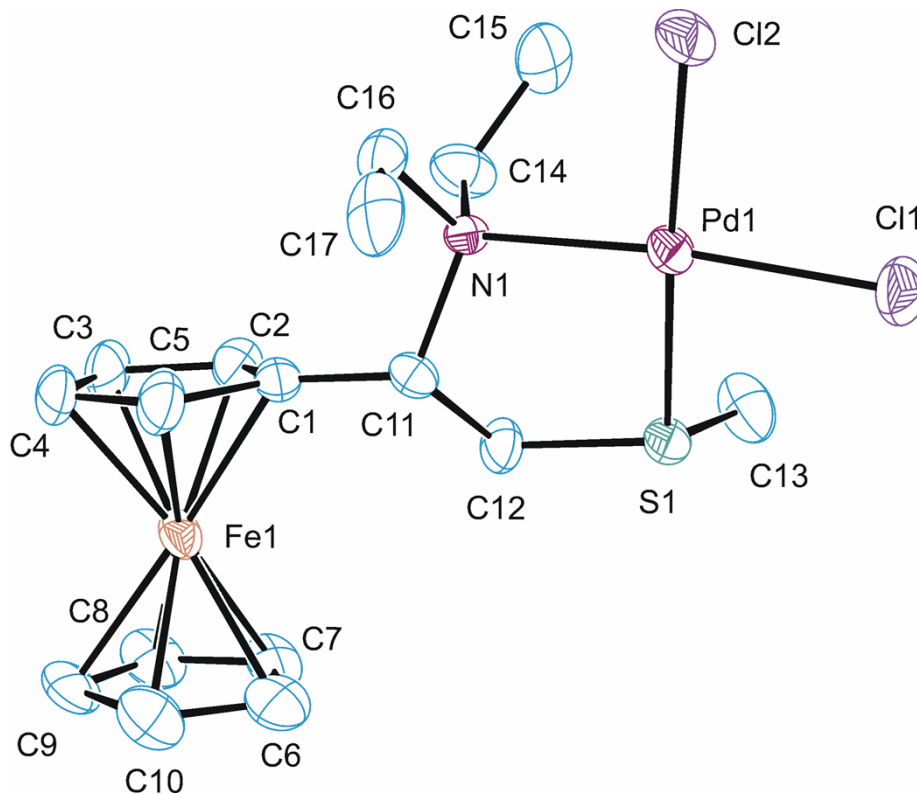

**Fig. S5** The molecular structure of **6** in polymorph II with the atom numbering scheme (hydrogen atoms are omitted for clarity). Displacement ellipsoids are drawn at 30% probability level. Other projections of the molecule are given in Figure S6.

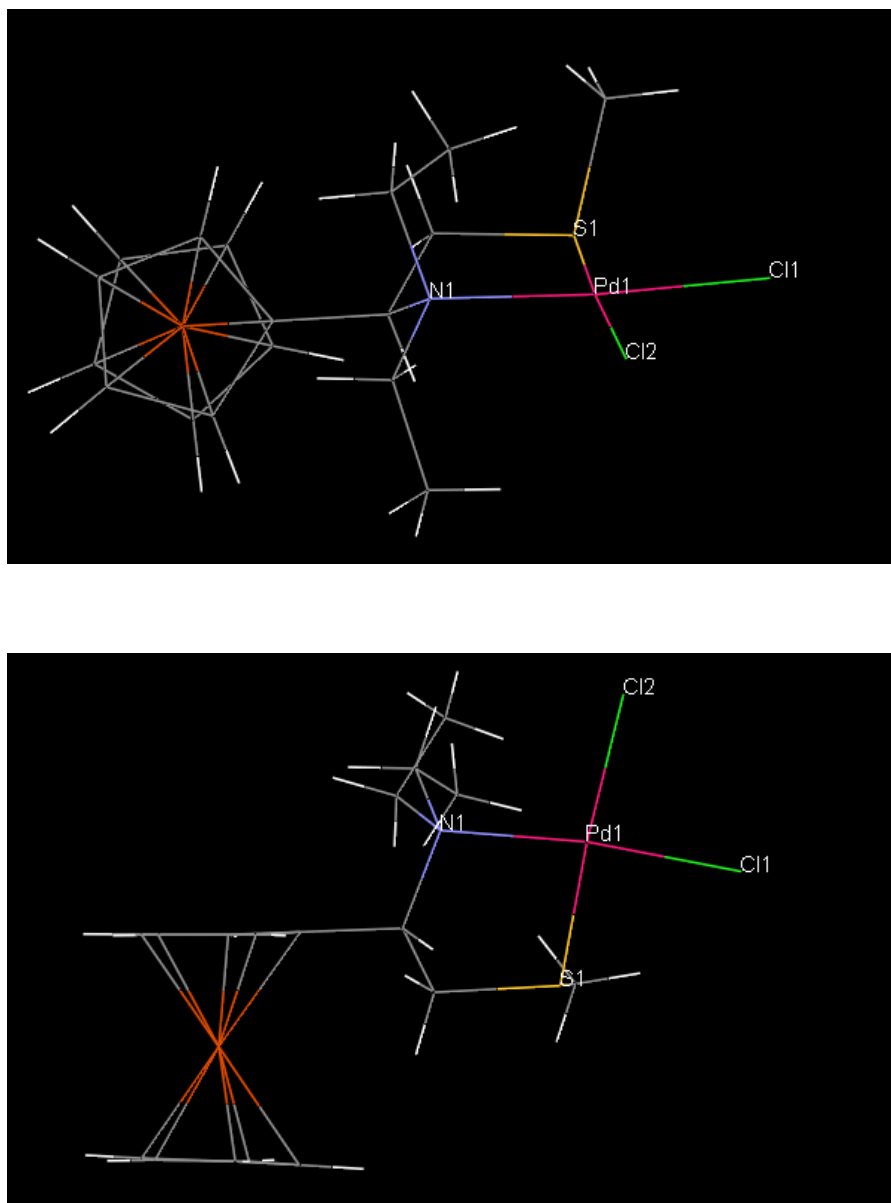

**Fig. S6** Crystal structure of **6** (polymorph II) shown in two orthogonal projections.

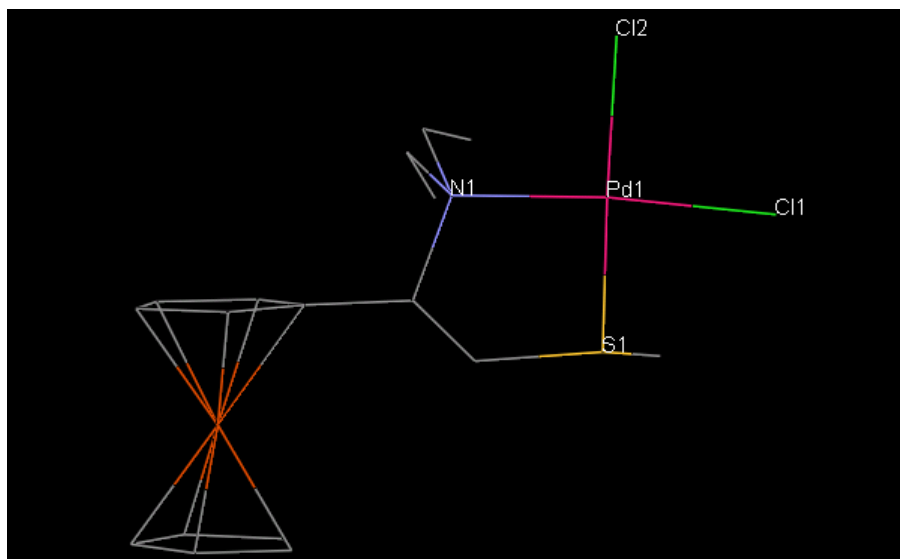

(a)

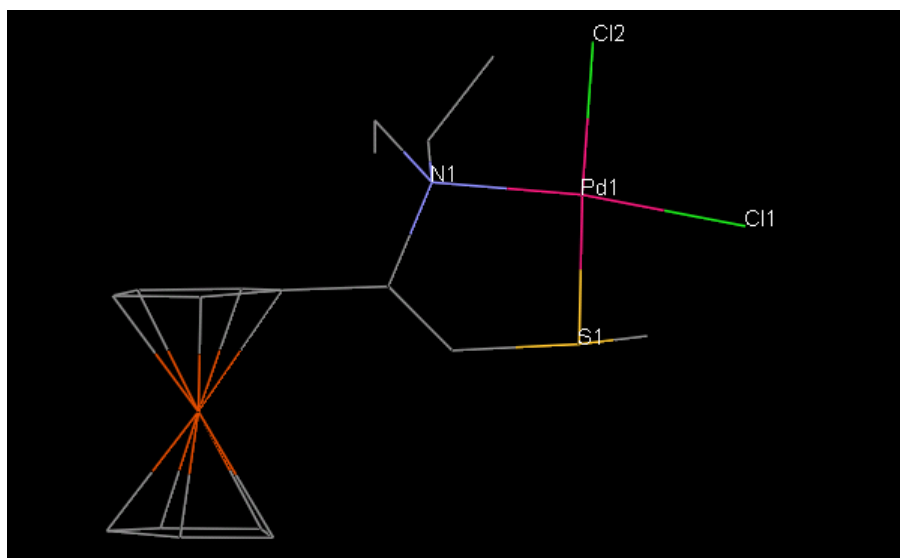

(b)

**Fig. S7** Polymorphs I (a) and II (b) have different orientation of the two ethyl groups bonded to the N1 atom.

**Table S5** Crystallographic data for the crystal structure of **6**.

|                                                                                                            |                                                                    |
|------------------------------------------------------------------------------------------------------------|--------------------------------------------------------------------|
| Empirical formula                                                                                          | C <sub>17</sub> H <sub>25</sub> Cl <sub>2</sub> Fe N Pd S          |
| Formula weight                                                                                             | 508.59                                                             |
| Color, crystal shape                                                                                       | Dark red, prismatic                                                |
| Crystal size (mm <sup>3</sup> )                                                                            | 0.24 x 0.15 x 0.13                                                 |
| Temperature (K)                                                                                            | 293(2)                                                             |
| Wavelength (Å)                                                                                             | 0.71073                                                            |
| Crystal system                                                                                             | Orthorhombic                                                       |
| Space group                                                                                                | <i>Pna2</i> <sub>1</sub>                                           |
| Unit cell dimensions                                                                                       |                                                                    |
| <i>a</i> (Å)                                                                                               | 13.6982(5)                                                         |
| <i>b</i> (Å)                                                                                               | 18.1868(7)                                                         |
| <i>c</i> (Å)                                                                                               | 7.6277(3)                                                          |
| Volume (Å <sup>3</sup> )                                                                                   | 1900.26(13)                                                        |
| <i>Z</i>                                                                                                   | 4                                                                  |
| <i>D</i> <sub>calc</sub> (Mg/m <sup>3</sup> )                                                              | 1.778                                                              |
| $\mu$ (mm <sup>-1</sup> )                                                                                  | 2.098                                                              |
| F(000)                                                                                                     | 1024                                                               |
| $\theta$ range for data collection (°)                                                                     | 3.17 – 29.16                                                       |
| Index ranges                                                                                               | -17 ≤ <i>h</i> ≤ 17,<br>-24 ≤ <i>k</i> ≤ 24,<br>-10 ≤ <i>l</i> ≤ 9 |
| Reflections collected                                                                                      | 10081                                                              |
| Independent reflections, <i>R</i> <sub>int</sub>                                                           | 4175, 0.0267                                                       |
| Completeness to $\theta = 27.00^\circ$                                                                     | 99.7 %                                                             |
| Refinement method                                                                                          | Full-matrix least-squares<br>on F <sup>2</sup>                     |
| Data / restraints / parameters                                                                             | 4175 / 0 / 212                                                     |
| Goodness-of-fit on F <sup>2</sup>                                                                          | 1.139                                                              |
| Final <i>R</i> <sub>1</sub> / <i>wR</i> <sub>2</sub> indices ( <i>I</i> > 2 $\sigma$ <sub><i>I</i></sub> ) | 0.0571, 0.1423                                                     |
| Final <i>R</i> <sub>1</sub> / <i>wR</i> <sub>2</sub> indices (all data)                                    | 0.0634, 0.1465                                                     |
| Largest diff. peak and hole (e Å <sup>-3</sup> )                                                           | 1.268 and -1.169                                                   |

**Table S6** Selected bond lengths (Å) and bond angles (°) in the crystal structure of **6**.

| b o n   | b o n       |
|---------|-------------|
| Pd1-N1  | N1-Pd1-S1   |
| Pd1-S1  | N1-Pd1-C11  |
| Pd1-C11 | S1-Pd1-C11  |
| Pd1-C12 | N1-Pd1-C12  |
| Fe1-C2  | S1-Pd1-C12  |
| Fe1-C7  | C11-Pd1-C12 |
| Fe1-C8  | C13-S1-C12  |
| Fe1-C5  | C13-S1-Pd1  |
| Fe1-C4  | C12-S1-Pd1  |
| Fe1-C3  | C16-N1-C14  |
| Fe1-C9  | C16-N1-C11  |
| Fe1-C1  | C14-N1-C11  |
| Fe1-C10 | C16-N1-Pd1  |
| Fe1-C6  | C14-N1-Pd1  |
| S1-C13  | C11-N1-Pd1  |
| S1-C12  | C2-C1-C5    |
| N1-C16  | C2-C1-C11   |
| N1-C14  | C5-C1-C11   |
| N1-C11  | C3-C2-C1    |
| C1-C2   | C4-C3-C2    |
| C1-C5   | C3-C4-C5    |
| C1-C11  | C4-C5-C1    |
| C2-C3   | C10-C6-C7   |
| C3-C4   | C8-C7-C6    |
| C4-C5   | C9-C8-C7    |
| C6-C10  | C8-C9-C10   |
| C6-C7   | C6-C10-C9   |
| C7-C8   | C1-C11-C12  |
| C8-C9   | C1-C11-N1   |
| C9-C10  | C12-C11-N1  |
| C11-C12 | C11-C12-S1  |
| C14-C15 | C15-C14-N1  |
| C16-C17 | N1-C16-C17  |





**Fig. S4** Molecules of **6** form a dimer with two ferrocene units placed in parallel orientation and direct contact. The formation of the dimer is based on a large stabilizing electrostatic complementarity between two ferrocene units (G. A. Bogdanovic and S. B. Novakovic, *CrystEngComm*, 2011, **13**, 6930–6932).
